# Supplementary material for: An automated quantum chemistry-driven, experimental characterization for high PCE donor–π–acceptor NIR molecular dyes
Source: Royal Society of Chemistry journal article supplement (doi:10.1039/d3dd00023k), 2023-01-01

Supporting information for an Automated  
Quantum Chemistry-Driven Experimental  
Characterization for High PCE  
Donor- $\pi$ -Acceptor NIR Molecular Dyes

Taylor J Santaloci<sup>1</sup>, William E Meador<sup>1</sup>, Austin M Wallace<sup>1</sup>, E  
Michael Valencia<sup>1</sup>, Blake N Rogers<sup>1</sup>, Jared H Delcamp<sup>1</sup> and Ryan  
C Fortenberry<sup>1</sup>

<sup>1</sup>Department of Chemistry and Biochemistry, University of  
Mississippi, Oxford, Mississippi, 38655, United States of America

Table S1: Benchmark absorption energies for the quantum methods: CAM-B3LYP/6-311G(d,p), BHandHLYP/6-311G(d,p), PBE0/6-311G(d,p), the statistical LSF method, and experimental  $\lambda_{max}$  in the vacuum model

| Name    | CAM-B3LYP | BHandHLYP | PBE1PBE | Exp  | LSF  |
|---------|-----------|-----------|---------|------|------|
| AP11    | 3.20      | 3.18      | 2.73    | 3.29 | 2.91 |
| AP14    | 3.16      | 3.15      | 2.68    | 3.11 | 2.88 |
| AP16    | 3.20      | 3.16      | 2.39    | 3.23 | 3.06 |
| AP17    | 3.28      | 3.24      | 2.46    | 3.27 | 3.14 |
| AP25    | 2.30      | 2.27      | 2.02    | 1.88 | 2.07 |
| AP3     | 2.15      | 2.12      | 1.69    | 1.91 | 2.02 |
| BTD-1   | 2.50      | 2.41      | 1.76    | 2.41 | 2.44 |
| C218    | 2.67      | 2.65      | 2.21    | 2.26 | 2.46 |
| C258    | 2.42      | 2.35      | 1.89    | 2.71 | 2.29 |
| C271    | 2.81      | 2.80      | 2.52    | 2.44 | 2.50 |
| C272    | 2.53      | 2.44      | 1.99    | 2.42 | 2.38 |
| D-      | 2.59      | 2.51      | 1.99    | 2.83 | 2.46 |
| DAHTDTT |           |           |         |      |      |
| D1      | 2.34      | 2.29      | 1.74    | 2.18 | 2.24 |
| D3      | 2.30      | 2.21      | 1.55    | 2.21 | 2.29 |
| DQ5     | 2.41      | 2.36      | 1.94    | 2.27 | 2.25 |
| FNE32   | 2.04      | 2.02      | 1.76    | 2.08 | 1.84 |
| FNE34   | 2.28      | 2.25      | 1.90    | 1.99 | 2.09 |
| FNE52   | 2.50      | 2.45      | 1.90    | 2.36 | 2.38 |
| HKK-    | 2.30      | 2.24      | 1.70    | 2.30 | 2.22 |
| BTZ4    |           |           |         |      |      |
| IQ21    | 2.57      | 2.53      | 2.06    | 2.23 | 2.39 |
| IQ4     | 2.82      | 2.78      | 2.11    | 2.35 | 2.71 |
| IQ6     | 2.63      | 2.58      | 1.96    | 2.29 | 2.52 |
| JD21    | 2.37      | 2.36      | 1.90    | 2.13 | 2.21 |
| JW1     | 2.32      | 2.30      | 1.91    | 2.10 | 2.14 |
| ND1     | 2.22      | 2.19      | 1.83    | 1.92 | 2.04 |
| ND2     | 2.40      | 2.38      | 2.14    | 1.94 | 2.14 |
| ND3     | 2.22      | 2.20      | 1.91    | 1.86 | 2.01 |
| NKX-    | 2.53      | 2.53      | 2.22    | 2.25 | 2.27 |
| 2883    |           |           |         |      |      |
| NL11    | 2.36      | 2.35      | 1.95    | 2.18 | 2.18 |
| NL12    | 2.34      | 2.33      | 1.89    | 2.20 | 2.18 |
| NL13    | 2.37      | 2.36      | 2.02    | 2.10 | 2.15 |
| NL2     | 2.21      | 2.21      | 1.88    | 2.00 | 2.02 |
| NL3     | 2.19      | 2.19      | 1.86    | 1.91 | 2.00 |
| NL4     | 2.13      | 2.12      | 1.81    | 1.89 | 1.94 |
| NL5     | 2.24      | 2.23      | 1.90    | 1.85 | 2.04 |
| NL6     | 2.25      | 2.24      | 1.38    | 2.05 | 2.30 |
| NL7     | 2.42      | 2.41      | 2.01    | 2.11 | 2.23 |

|          |      |      |      |      |      |
|----------|------|------|------|------|------|
| NL8      | 2.34 | 2.33 | 1.92 | 1.98 | 2.16 |
| R4       | 2.23 | 2.18 | 1.66 | 2.02 | 2.14 |
| R6       | 2.11 | 2.05 | 1.62 | 1.97 | 2.00 |
| R6       | 2.11 | 2.05 | 1.62 | 1.97 | 2.00 |
| RR9      | 3.12 | 3.08 | 2.48 | 3.11 | 2.92 |
| S-       | 2.75 | 2.67 | 2.11 | 2.81 | 2.62 |
| DAHTD TT |      |      |      |      |      |
| S3       | 2.23 | 2.19 | 1.65 | 1.98 | 2.15 |
| SGT-121  | 2.64 | 2.59 | 1.99 | 2.64 | 2.53 |
| SGT-129  | 2.96 | 2.85 | 1.95 | 2.91 | 2.96 |
| SGT-130  | 2.48 | 2.39 | 1.72 | 2.41 | 2.44 |
| SGT-136  | 2.32 | 2.23 | 1.65 | 2.34 | 2.27 |
| T-       | 2.75 | 2.68 | 2.10 | 2.86 | 2.61 |
| DAHTD TT |      |      |      |      |      |
| TH304    | 2.57 | 2.58 | 2.03 | 2.18 | 2.41 |
| TP1      | 2.28 | 2.25 | 1.84 | 2.14 | 2.13 |
| TPA-T-   | 2.87 | 2.82 | 2.27 | 3.00 | 2.69 |
| TTAR-A   |      |      |      |      |      |
| TPA-T-   | 2.79 | 2.71 | 2.12 | 3.00 | 2.66 |
| TTAR-T-  |      |      |      |      |      |
| A        |      |      |      |      |      |
| TPA-     | 2.97 | 2.94 | 2.42 | 2.49 | 2.75 |
| TTAR-A   |      |      |      |      |      |
| TTAR-15  | 2.74 | 2.69 | 2.24 | 2.49 | 2.54 |
| TTAR-9   | 2.84 | 2.77 | 2.24 | 2.39 | 2.67 |
| TTAR-B8  | 2.72 | 2.68 | 2.24 | 2.56 | 2.51 |
| WS-55    | 2.40 | 2.34 | 1.97 | 2.22 | 2.22 |
| WS-6     | 2.45 | 2.40 | 1.95 | 2.27 | 2.29 |
| XY1      | 2.40 | 2.33 | 1.83 | 2.25 | 2.28 |
| Y123     | 2.65 | 2.63 | 2.20 | 2.45 | 2.43 |
| YZ12     | 2.38 | 2.31 | 1.93 | 2.29 | 2.21 |
| YZ15     | 2.34 | 2.26 | 1.87 | 2.26 | 2.19 |
| ZL003    | 2.49 | 2.44 | 2.03 | 2.39 | 2.31 |

Table S2: Benchmark absorption energies for the quantum methods: CAM-B3LYP/6-311G(d,p), BHandHLYP/6-311G(d,p), PBE0/6-311G(d,p), the statistical LSF method, and experimental  $\lambda_{max}$  in the tetrahydrofuran PCM model

| Name | CAM-<br>B3LYP | BHand<br>HLYP | PBE1PBE | Exp  | LSF  |
|------|---------------|---------------|---------|------|------|
| AP11 | 3.10          | 3.07          | 2.61    | 3.29 | 2.97 |
| AP14 | 3.04          | 3.03          | 2.54    | 3.11 | 2.93 |
| AP16 | 3.15          | 3.12          | 2.53    | 3.23 | 3.05 |
| AP17 | 3.21          | 3.18          | 2.52    | 3.27 | 3.12 |
| AP25 | 2.17          | 2.13          | 1.75    | 1.88 | 2.10 |

|         |      |      |      |      |      |
|---------|------|------|------|------|------|
| AP3     | 2.14 | 2.12 | 1.67 | 1.91 | 2.08 |
| BTD-1   | 2.48 | 2.39 | 1.75 | 2.41 | 2.45 |
| C218    | 2.52 | 2.49 | 2.04 | 2.26 | 2.43 |
| C258    | 2.39 | 2.31 | 1.86 | 2.71 | 2.33 |
| C271    | 2.67 | 2.66 | 2.37 | 2.44 | 2.54 |
| C272    | 2.52 | 2.44 | 2.00 | 2.42 | 2.44 |
| D-      | 2.50 | 2.42 | 1.92 | 2.83 | 2.43 |
| DAHTDDT |      |      |      |      |      |
| D1      | 2.25 | 2.19 | 1.62 | 2.18 | 2.21 |
| D3      | 2.23 | 2.13 | 1.50 | 2.21 | 2.21 |
| DQ5     | 2.34 | 2.28 | 1.83 | 2.27 | 2.27 |
| FNE32   | 1.95 | 1.93 | 1.68 | 2.08 | 1.87 |
| FNE34   | 2.20 | 2.17 | 1.81 | 1.99 | 2.13 |
| FNE52   | 2.44 | 2.38 | 1.81 | 2.36 | 2.39 |
| HKK-    | 2.26 | 2.18 | 1.63 | 2.30 | 2.22 |
| BTZ4    |      |      |      |      |      |
| IQ21    | 2.45 | 2.41 | 1.94 | 2.23 | 2.38 |
| IQ4     | 2.73 | 2.68 | 1.96 | 2.35 | 2.68 |
| IQ6     | 2.56 | 2.50 | 1.85 | 2.29 | 2.52 |
| JD21    | 2.34 | 2.32 | 1.87 | 2.13 | 2.26 |
| JW1     | 2.22 | 2.20 | 1.76 | 2.10 | 2.15 |
| ND1     | 2.08 | 2.06 | 1.72 | 1.92 | 2.00 |
| ND2     | 2.26 | 2.23 | 1.97 | 1.94 | 2.15 |
| ND3     | 2.06 | 2.03 | 1.72 | 1.86 | 1.98 |
| NKX-    | 2.38 | 2.38 | 2.04 | 2.25 | 2.28 |
| 2883    |      |      |      |      |      |
| NL11    | 2.28 | 2.26 | 1.83 | 2.18 | 2.21 |
| NL12    | 2.31 | 2.28 | 1.84 | 2.20 | 2.23 |
| NL13    | 2.27 | 2.26 | 1.88 | 2.10 | 2.19 |
| NL2     | 2.11 | 2.10 | 1.75 | 2.00 | 2.03 |
| NL3     | 2.09 | 2.08 | 1.73 | 1.91 | 2.01 |
| NL4     | 2.02 | 2.01 | 1.67 | 1.89 | 1.95 |
| NL5     | 2.15 | 2.14 | 1.82 | 1.85 | 2.06 |
| NL6     | 2.18 | 2.16 | 1.74 | 2.05 | 2.11 |
| NL7     | 2.36 | 2.34 | 1.91 | 2.11 | 2.28 |
| NL8     | 2.25 | 2.25 | 1.81 | 1.98 | 2.18 |
| R4      | 2.21 | 2.17 | 1.77 | 2.02 | 2.14 |
| R6      | 2.09 | 2.03 | 1.65 | 1.97 | 2.03 |
| RR9     | 3.11 | 3.08 | 2.58 | 3.11 | 3.00 |
| S-      | 2.65 | 2.57 | 2.05 | 2.81 | 2.58 |
| DAHTDDT |      |      |      |      |      |
| S3      | 2.21 | 2.16 | 1.62 | 1.98 | 2.16 |
| SGT-121 | 2.56 | 2.51 | 1.94 | 2.64 | 2.50 |
| SGT-129 | 2.91 | 2.84 | 1.98 | 2.91 | 2.89 |
| SGT-130 | 2.51 | 2.43 | 1.79 | 2.41 | 2.47 |
| SGT-136 | 2.35 | 2.26 | 1.68 | 2.34 | 2.32 |

|          |      |      |      |      |      |
|----------|------|------|------|------|------|
| T-       | 2.66 | 2.59 | 2.08 | 2.86 | 2.58 |
| DAHTD TT |      |      |      |      |      |
| TH304    | 2.43 | 2.43 | 1.87 | 2.18 | 2.36 |
| TP1      | 2.27 | 2.23 | 1.81 | 2.14 | 2.19 |
| TPA-T-   | 2.75 | 2.70 | 2.18 | 3.00 | 2.66 |
| TTAR-A   |      |      |      |      |      |
| TPA-T-   | 2.69 | 2.62 | 2.08 | 3.00 | 2.62 |
| TTAR-T-  |      |      |      |      |      |
| A        |      |      |      |      |      |
| TPA-     | 2.84 | 2.81 | 2.29 | 2.49 | 2.75 |
| TTAR-A   |      |      |      |      |      |
| TTAR-15  | 2.62 | 2.57 | 2.14 | 2.49 | 2.53 |
| TTAR-9   | 2.73 | 2.67 | 2.16 | 2.39 | 2.65 |
| TTAR-B8  | 2.62 | 2.57 | 2.13 | 2.56 | 2.52 |
| WS-55    | 2.27 | 2.21 | 1.81 | 2.22 | 2.20 |
| WS-6     | 2.35 | 2.30 | 1.81 | 2.27 | 2.29 |
| XY1      | 2.33 | 2.25 | 1.83 | 2.25 | 2.26 |
| Y123     | 2.52 | 2.49 | 2.09 | 2.45 | 2.42 |
| YZ12     | 2.30 | 2.23 | 1.85 | 2.29 | 2.23 |
| YZ15     | 2.29 | 2.21 | 1.82 | 2.26 | 2.21 |
| ZL003    | 2.46 | 2.41 | 2.02 | 2.39 | 2.38 |

Table S3: Benchmark absorption energies for the quantum methods: CAM-B3LYP/6-311G(d,p), BHandHLYP/6-311G(d,p), PBE0/6-311G(d,p), the statistical LSF method, and experimental  $\lambda_{max}$  in the N,N-dimethylformamide PCM model

| Name     | CAM-<br>B3LYP | BHand<br>HLYP | PBE1PBE | Exp  | LSF  |
|----------|---------------|---------------|---------|------|------|
| AP11     | 3.10          | 3.07          | 2.61    | 3.29 | 2.97 |
| AP14     | 3.04          | 3.03          | 2.54    | 3.11 | 2.92 |
| AP16     | 3.16          | 3.14          | 2.59    | 3.23 | 3.04 |
| AP17     | 3.22          | 3.19          | 2.55    | 3.27 | 3.10 |
| AP25     | 2.17          | 2.13          | 1.75    | 1.88 | 2.09 |
| AP3      | 2.15          | 2.13          | 1.67    | 1.91 | 2.08 |
| BTD-1    | 2.50          | 2.41          | 1.77    | 2.41 | 2.43 |
| C218     | 2.51          | 2.49          | 2.04    | 2.26 | 2.41 |
| C258     | 2.40          | 2.32          | 1.86    | 2.71 | 2.32 |
| C271     | 2.66          | 2.65          | 2.36    | 2.44 | 2.53 |
| C272     | 2.53          | 2.45          | 2.02    | 2.42 | 2.43 |
| D-       | 2.50          | 2.42          | 1.93    | 2.83 | 2.41 |
| DAHTD TT |               |               |         |      |      |
| D1       | 2.26          | 2.20          | 1.62    | 2.18 | 2.19 |
| D3       | 2.23          | 2.14          | 1.51    | 2.21 | 2.18 |
| DQ5      | 2.34          | 2.28          | 1.83    | 2.27 | 2.25 |
| FNE32    | 1.95          | 1.93          | 1.68    | 2.08 | 1.87 |

|          |      |      |      |      |      |
|----------|------|------|------|------|------|
| FNE34    | 2.20 | 2.17 | 1.80 | 1.99 | 2.12 |
| FNE52    | 2.44 | 2.38 | 1.81 | 2.36 | 2.36 |
| HKK-     | 2.27 | 2.19 | 1.64 | 2.30 | 2.20 |
| BTZ4     |      |      |      |      |      |
| IQ21     | 2.45 | 2.41 | 1.94 | 2.23 | 2.36 |
| IQ4      | 2.73 | 2.68 | 1.96 | 2.35 | 2.65 |
| IQ6      | 2.57 | 2.51 | 1.84 | 2.29 | 2.49 |
| JD21     | 2.34 | 2.32 | 1.88 | 2.13 | 2.25 |
| JW1      | 2.22 | 2.19 | 1.74 | 2.10 | 2.13 |
| ND1      | 2.08 | 2.05 | 1.73 | 1.92 | 1.99 |
| ND2      | 2.25 | 2.22 | 1.96 | 1.94 | 2.15 |
| ND3      | 2.05 | 2.02 | 1.71 | 1.86 | 1.96 |
| NKX-     | 2.37 | 2.37 | 2.02 | 2.25 | 2.26 |
| 2883     |      |      |      |      |      |
| NL11     | 2.29 | 2.27 | 1.82 | 2.18 | 2.20 |
| NL12     | 2.32 | 2.29 | 1.85 | 2.20 | 2.23 |
| NL13     | 2.27 | 2.25 | 1.87 | 2.10 | 2.18 |
| NL2      | 2.11 | 2.10 | 1.74 | 2.00 | 2.02 |
| NL3      | 2.09 | 2.08 | 1.73 | 1.91 | 2.01 |
| NL4      | 2.02 | 2.00 | 1.66 | 1.89 | 1.94 |
| NL5      | 2.15 | 2.14 | 1.82 | 1.85 | 2.05 |
| NL6      | 2.18 | 2.16 | 1.73 | 2.05 | 2.10 |
| NL7      | 2.36 | 2.34 | 1.90 | 2.11 | 2.26 |
| NL8      | 2.25 | 2.25 | 1.81 | 1.98 | 2.17 |
| R4       | 2.21 | 2.17 | 1.80 | 2.02 | 2.13 |
| R6       | 2.09 | 2.04 | 1.66 | 1.97 | 2.01 |
| RR9      | 3.13 | 3.09 | 2.61 | 3.11 | 3.00 |
| S-       | 2.65 | 2.57 | 2.06 | 2.81 | 2.56 |
| DAHTD TT |      |      |      |      |      |
| S3       | 2.23 | 2.18 | 1.64 | 1.98 | 2.16 |
| SGT-121  | 2.57 | 2.52 | 1.96 | 2.64 | 2.48 |
| SGT-129  | 2.93 | 2.85 | 2.02 | 2.91 | 2.85 |
| SGT-130  | 2.53 | 2.45 | 1.82 | 2.41 | 2.46 |
| SGT-136  | 2.38 | 2.29 | 1.71 | 2.34 | 2.31 |
| T-       | 2.65 | 2.59 | 2.09 | 2.86 | 2.56 |
| DAHTD TT |      |      |      |      |      |
| TH304    | 2.43 | 2.43 | 1.86 | 2.18 | 2.34 |
| TP1      | 2.27 | 2.24 | 1.82 | 2.14 | 2.19 |
| TPA-T-   | 2.74 | 2.70 | 2.18 | 3.00 | 2.64 |
| TTAR-A   |      |      |      |      |      |
| TPA-T-   | 2.69 | 2.62 | 2.09 | 3.00 | 2.60 |
| TTAR-T-  |      |      |      |      |      |
| A        |      |      |      |      |      |
| TPA-     | 2.84 | 2.80 | 2.29 | 2.49 | 2.73 |
| TTAR-A   |      |      |      |      |      |
| TTAR-15  | 2.62 | 2.57 | 2.14 | 2.49 | 2.51 |
| TTAR-9   | 2.73 | 2.67 | 2.17 | 2.39 | 2.63 |
| TTAR-B8  | 2.61 | 2.57 | 2.13 | 2.56 | 2.51 |

|       |      |      |      |      |      |
|-------|------|------|------|------|------|
| WS-55 | 2.26 | 2.20 | 1.79 | 2.22 | 2.18 |
| WS-6  | 2.35 | 2.31 | 1.81 | 2.27 | 2.27 |
| XY1   | 2.33 | 2.25 | 1.84 | 2.25 | 2.24 |
| Y123  | 2.52 | 2.49 | 2.09 | 2.45 | 2.41 |
| YZ12  | 2.31 | 2.24 | 1.86 | 2.29 | 2.22 |
| YZ15  | 2.30 | 2.23 | 1.84 | 2.26 | 2.21 |
| ZL003 | 2.47 | 2.42 | 2.04 | 2.39 | 2.37 |

Table S4: Benchmark absorption energies for the quantum methods: CAM-B3LYP/6-311G(d,p), BHandHLYP/6-311G(d,p), PBE0/6-311G(d,p), the statistical LSF method, and experimental  $\lambda_{max}$  in the dichloromethane PCM model

| Name    | CAM-<br>B3LYP | BHand<br>HLYP | PBE1PBE | Exp  | LSF  |
|---------|---------------|---------------|---------|------|------|
| AP11    | 3.09          | 3.07          | 2.61    | 3.29 | 2.96 |
| AP14    | 3.04          | 3.02          | 2.54    | 3.11 | 2.91 |
| AP16    | 3.15          | 3.12          | 2.54    | 3.23 | 3.03 |
| AP17    | 3.21          | 3.18          | 2.52    | 3.27 | 3.10 |
| AP25    | 2.17          | 2.13          | 1.75    | 1.88 | 2.09 |
| AP3     | 2.14          | 2.12          | 1.67    | 1.91 | 2.08 |
| BTD-1   | 2.49          | 2.39          | 1.76    | 2.41 | 2.43 |
| C218    | 2.51          | 2.49          | 2.04    | 2.26 | 2.42 |
| C258    | 2.39          | 2.31          | 1.86    | 2.71 | 2.32 |
| C271    | 2.66          | 2.65          | 2.36    | 2.44 | 2.53 |
| C272    | 2.52          | 2.44          | 2.00    | 2.42 | 2.43 |
| D-      | 2.50          | 2.41          | 1.92    | 2.83 | 2.42 |
| DAHTDTT |               |               |         |      |      |
| D1      | 2.25          | 2.19          | 1.62    | 2.18 | 2.20 |
| D3      | 2.23          | 2.13          | 1.50    | 2.21 | 2.19 |
| DQ5     | 2.34          | 2.28          | 1.83    | 2.27 | 2.26 |
| FNE32   | 1.95          | 1.93          | 1.67    | 2.08 | 1.86 |
| FNE34   | 2.20          | 2.17          | 1.81    | 1.99 | 2.12 |
| FNE52   | 2.44          | 2.38          | 1.81    | 2.36 | 2.37 |
| HKK-    | 2.26          | 2.18          | 1.63    | 2.30 | 2.21 |
| BTZ4    |               |               |         |      |      |
| IQ21    | 2.45          | 2.41          | 1.94    | 2.23 | 2.36 |
| IQ4     | 2.73          | 2.68          | 1.96    | 2.35 | 2.66 |
| IQ6     | 2.56          | 2.50          | 1.85    | 2.29 | 2.50 |
| JD21    | 2.34          | 2.32          | 1.87    | 2.13 | 2.25 |
| JW1     | 2.22          | 2.19          | 1.75    | 2.10 | 2.14 |
| ND1     | 2.08          | 2.05          | 1.72    | 1.92 | 1.99 |
| ND2     | 2.25          | 2.22          | 1.97    | 1.94 | 2.14 |
| ND3     | 2.05          | 2.02          | 1.71    | 1.86 | 1.96 |
| NKX-    | 2.37          | 2.37          | 2.03    | 2.25 | 2.27 |
| 2883    |               |               |         |      |      |

|          |      |      |      |      |      |
|----------|------|------|------|------|------|
| NL11     | 2.28 | 2.26 | 1.83 | 2.18 | 2.20 |
| NL12     | 2.30 | 2.28 | 1.84 | 2.20 | 2.22 |
| NL13     | 2.27 | 2.25 | 1.87 | 2.10 | 2.18 |
| NL2      | 2.11 | 2.10 | 1.75 | 2.00 | 2.02 |
| NL3      | 2.09 | 2.08 | 1.73 | 1.91 | 2.00 |
| NL4      | 2.02 | 2.00 | 1.66 | 1.89 | 1.94 |
| NL5      | 2.14 | 2.13 | 1.82 | 1.85 | 2.05 |
| NL6      | 2.18 | 2.16 | 1.73 | 2.05 | 2.10 |
| NL7      | 2.35 | 2.34 | 1.91 | 2.11 | 2.27 |
| NL8      | 2.25 | 2.25 | 1.81 | 1.98 | 2.17 |
| R4       | 2.21 | 2.17 | 1.77 | 2.02 | 2.13 |
| R6       | 2.09 | 2.03 | 1.65 | 1.97 | 2.02 |
| RR9      | 3.11 | 3.08 | 2.58 | 3.11 | 2.99 |
| S-       | 2.65 | 2.57 | 2.05 | 2.81 | 2.57 |
| DAHTD TT |      |      |      |      |      |
| S3       | 2.21 | 2.16 | 1.62 | 1.98 | 2.15 |
| SGT-121  | 2.56 | 2.51 | 1.94 | 2.64 | 2.49 |
| SGT-129  | 2.91 | 2.84 | 1.99 | 2.91 | 2.87 |
| SGT-130  | 2.51 | 2.43 | 1.79 | 2.41 | 2.46 |
| SGT-136  | 2.36 | 2.26 | 1.69 | 2.34 | 2.30 |
| T-       | 2.65 | 2.59 | 2.08 | 2.86 | 2.56 |
| DAHTD TT |      |      |      |      |      |
| TH304    | 2.43 | 2.43 | 1.86 | 2.18 | 2.35 |
| TP1      | 2.27 | 2.24 | 1.81 | 2.14 | 2.18 |
| TPA-T-   | 2.75 | 2.70 | 2.18 | 3.00 | 2.65 |
| TTAR-A   |      |      |      |      |      |
| TPA-T-   | 2.69 | 2.62 | 2.08 | 3.00 | 2.61 |
| TTAR-T-  |      |      |      |      |      |
| A        |      |      |      |      |      |
| TPA-     | 2.84 | 2.80 | 2.29 | 2.49 | 2.73 |
| TTAR-A   |      |      |      |      |      |
| TTAR-15  | 2.62 | 2.56 | 2.13 | 2.49 | 2.52 |
| TTAR-9   | 2.73 | 2.66 | 2.16 | 2.39 | 2.63 |
| TTAR-B8  | 2.61 | 2.57 | 2.13 | 2.56 | 2.51 |
| WS-55    | 2.27 | 2.21 | 1.80 | 2.22 | 2.19 |
| WS-6     | 2.35 | 2.30 | 1.81 | 2.27 | 2.28 |
| XY1      | 2.33 | 2.25 | 1.83 | 2.25 | 2.25 |
| Y123     | 2.51 | 2.49 | 2.09 | 2.45 | 2.41 |
| YZ12     | 2.30 | 2.23 | 1.85 | 2.29 | 2.22 |
| YZ15     | 2.28 | 2.21 | 1.82 | 2.26 | 2.20 |
| ZL003    | 2.46 | 2.41 | 2.03 | 2.39 | 2.37 |

Table S5: The individual benchmark data points for the LSF calculated MO diagram ordered by LUMO energies

| Name | HOMO  | LUMO  | Wavelength |
|------|-------|-------|------------|
| AP3  | -5.11 | -3.26 | 613        |



|         |       |       |     |
|---------|-------|-------|-----|
| JW1     | -5.17 | -3.27 | 580 |
| NL7     | -5.34 | -3.29 | 557 |
| Y123    | -5.39 | -3.32 | 511 |
| TP1     | -5.30 | -3.37 | 584 |
| C218    | -5.46 | -3.39 | 506 |
| C271    | -5.71 | -3.40 | 498 |
| C258    | -5.21 | -3.41 | 543 |
| C272    | -5.28 | -3.51 | 523 |
| IQ21    | -5.45 | -3.51 | 519 |
| TPA-    | -5.75 | -3.51 | 451 |
| TTAR-A  |       |       |     |
| NL11    | -5.34 | -3.53 | 571 |
| NL12    | -5.28 | -3.54 | 569 |
| IQ4     | -5.55 | -3.54 | 458 |
| NL13    | -5.38 | -3.55 | 578 |
| NL8     | -5.40 | -3.56 | 576 |
| ZL003   | -5.47 | -3.56 | 539 |
| IQ6     | -5.41 | -3.56 | 493 |
| YZ15    | -5.12 | -3.56 | 568 |
| TPA-T-  | -5.65 | -3.59 | 461 |
| TTAR-A  |       |       |     |
| JD21    | -5.93 | -3.60 | 562 |
| YZ12    | -5.26 | -3.62 | 561 |
| DQ5     | -5.45 | -3.63 | 552 |
| RR9     | -6.10 | -3.63 | 425 |
| SGT-121 | -5.41 | -3.63 | 491 |
| TTAR-B8 | -5.65 | -3.64 | 494 |
| SGT-129 | -5.42 | -3.64 | 419 |
| XY1     | -5.33 | -3.65 | 544 |
| FNE52   | -5.45 | -3.65 | 521 |
| TTAR-15 | -5.66 | -3.67 | 489 |
| T-      | -5.53 | -3.67 | 475 |
| DAHTDTT |       |       |     |
| NL2     | -5.35 | -3.68 | 616 |
| NL4     | -5.29 | -3.68 | 640 |
| NL5     | -5.39 | -3.69 | 608 |
| D-      | -5.43 | -3.69 | 505 |
| DAHTDTT |       |       |     |
| S-      | -5.56 | -3.69 | 475 |
| DAHTDTT |       |       |     |
| FNE34   | -5.41 | -3.70 | 594 |
| AP14    | -6.17 | -3.70 | 431 |
| S3      | -5.14 | -3.70 | 578 |
| TTAR-9  | -5.69 | -3.71 | 466 |
| ND2     | -5.56 | -3.71 | 580 |
| NL3     | -5.34 | -3.71 | 621 |
| WS-55   | -5.49 | -3.72 | 561 |

|          |       |       |     |
|----------|-------|-------|-----|
| R6       | -5.11 | -3.72 | 620 |
| TPA-T-   | -5.58 | -3.72 | 467 |
| TTAR-T-A |       |       |     |
| SGT-136  | -5.16 | -3.73 | 548 |
| R4       | -5.19 | -3.74 | 580 |
| ND1      | -5.31 | -3.76 | 608 |
| NKX-2883 | -5.73 | -3.78 | 548 |
| AP25     | -5.30 | -3.78 | 601 |
| ND3      | -5.38 | -3.78 | 620 |
| AP16     | -6.07 | -3.79 | 405 |
| WS-6     | -5.56 | -3.79 | 543 |
| BTD-1    | -5.35 | -3.81 | 508 |
| SGT-130  | -5.31 | -3.83 | 510 |
| TH304    | -5.66 | -3.88 | 516 |
| AP11     | -6.35 | -3.88 | 428 |
| FNE32    | -5.40 | -3.96 | 674 |
| HKK-     | -5.43 | -4.00 | 560 |
| BTZ4     |       |       |     |
| D3       | -5.31 | -4.07 | 543 |
| D1       | -5.50 | -4.09 | 554 |
| NL6      | -5.58 | -4.23 | 540 |

---

Figure S1: A molecular orbital diagram (MO) of the LSF calculated HOMO and LUMO orbital energy for the benchmark dyes that includes the trioxide/triiodide redox shuttle and  $\text{TiO}_2$  semiconduction conduction bands.

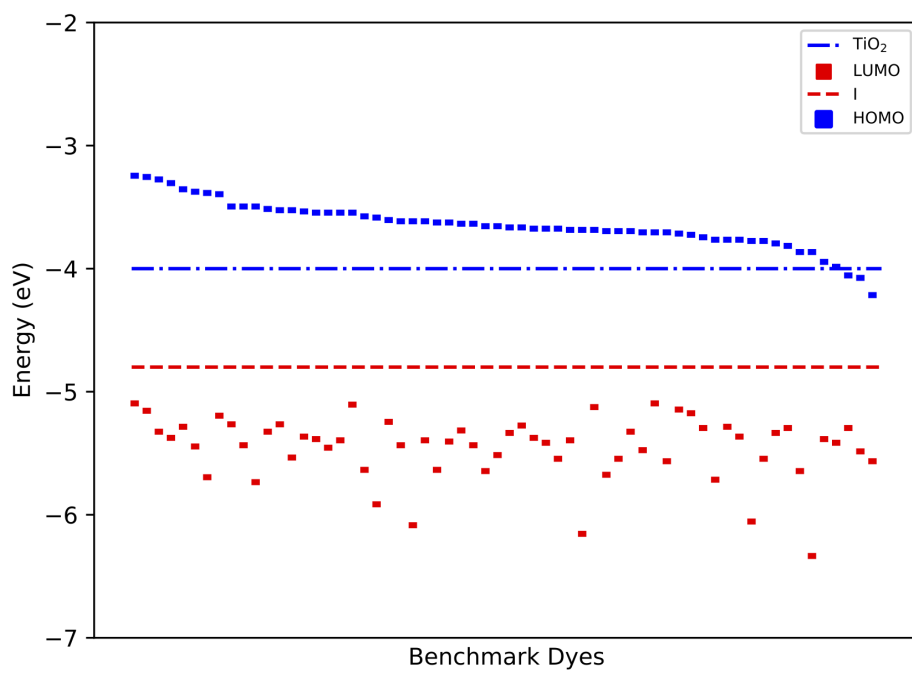

Figure S2: The benchmark dyes's dichloromethane excitation energies for the quantum methods: CAM-B3LYP/6-311G(d,p), BHandHLYP/6-311G(d,p), PBE0/6-311G(d,p) and the calculated LSF method with respect to the experiment.

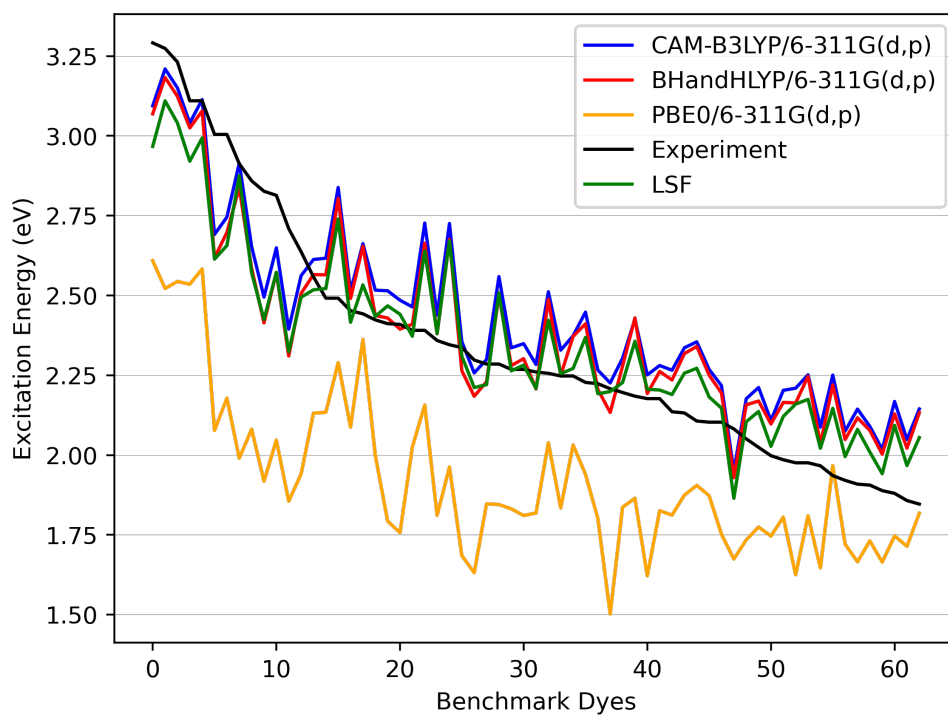

Figure S3: The benchmark dyes's tetrahydrofuran excitation energies for the quantum methods: CAM-B3LYP/6-311G(d,p), BHandHLYP/6-311G(d,p), PBE0/6-311G(d,p) and the calculated LSF method with respect to the experiment.

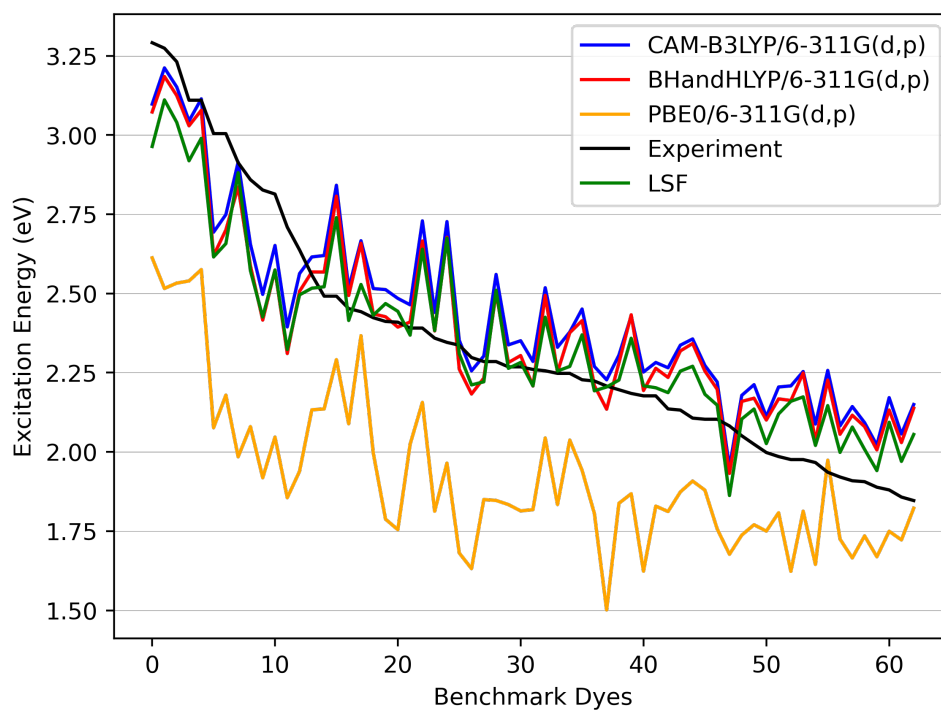

Figure S4: The benchmark dyes's N,N-dimethylformamide excitation energies for the quantum methods: CAM-B3LYP/6-311G(d,p), BHandHLYP/6-311G(d,p), PBE0/6-311G(d,p) and the calculated LSF method with respect to the experiment.

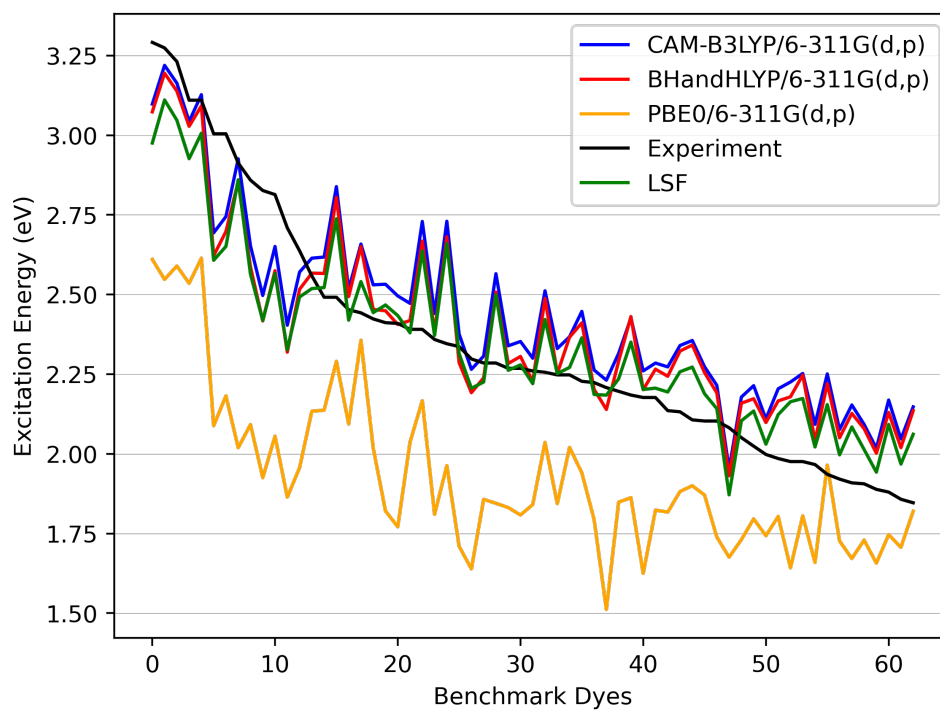

Figure S5: The  $\pi$ -bridge present in each theoretical dye with a LSF excitation energy less than FNE32. The light grey bars are 16b derivatives and the red bars are the 1b and 20b conjugated  $\pi$ -bridge. Lastly, the blue bars are other types of  $\pi$ -bridge involved with low energy absorbing dyes.

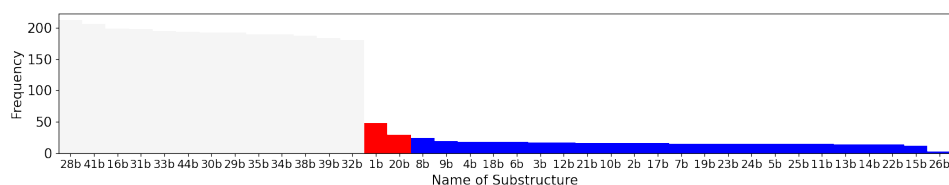

Table S6: The percentages and scoring for 800 to 1000

| Name           | HOMO Donor | LUMO Donor | HOMO Backbone | LUMO Backbone | HOMO Acceptor | LUMO Acceptor | HOMO Anchor | LUMO Anchor | HOMO Energy | LUMO energy | Wave | $\lambda_{max}$ Score | LUMO Score | Charge Transfer Score | Total Score |
|----------------|------------|------------|---------------|---------------|---------------|---------------|-------------|-------------|-------------|-------------|------|-----------------------|------------|-----------------------|-------------|
| 22ed_16b_5ea36 | 11         | 38         | 78            | 22            | 9             | 10            | 4           | -           | 5.06        | 3.70        | 807  | 52                    | 98         | 14                    | 164         |
| 6ed_16b_5ea 32 | 12         | 41         | 78            | 27            | 9             | 13            | 4           | -           | 5.16        | 3.60        | 803  | 51                    | 84         | 13                    | 147         |
| 9ed_29b_7ea 35 | 5          | 59         | 92            | 4             | 3             | 2             | 1           | -           | 4.87        | 3.75        | 853  | 63                    | 100        | 10                    | 0           |
| 7ed_29b_9ea 14 | 5          | 71         | 87            | 15            | 8             | 4             | 2           | -           | 4.90        | 3.74        | 856  | 64                    | 100        | 8                     | 0           |
| 7ed_29b_7ea 15 | 4          | 78         | 93            | 6             | 2             | 3             | 1           | -           | 4.85        | 3.53        | 852  | 63                    | 68         | 5                     | 0           |
| 7ed_29b_6ea 16 | 4          | 77         | 92            | 7             | 3             | 3             | 2           | -           | 5.00        | 3.78        | 847  | 62                    | 98         | 6                     | 0           |
| 7ed_29b_5ea 14 | 5          | 73         | 90            | 12            | 5             | 6             | 2           | -           | 4.95        | 3.80        | 862  | 66                    | 94         | 7                     | 0           |
| 7ed_29b_2ea 16 | 4          | 77         | 91            | 7             | 4             | 3             | 2           | -           | 4.98        | 3.77        | 847  | 62                    | 100        | 6                     | 0           |
| 7ed_29b_11ea16 | 5          | 75         | 91            | 9             | 4             | 3             | 2           | -           | 5.00        | 3.81        | 844  | 61                    | 92         | 6                     | 0           |
| 7ed_29b_10ea15 | 5          | 75         | 91            | 9             | 4             | 1             | 0           | -           | 4.97        | 3.76        | 845  | 61                    | 100        | 6                     | 0           |
| 7ed_28b_7ea 18 | 4          | 76         | 93            | 5             | 3             | 2             | 1           | -           | 4.97        | 3.70        | 850  | 62                    | 98         | 6                     | 0           |
| 6ed_29b_9ea 18 | 5          | 72         | 91            | 9             | 4             | 4             | 2           | -           | 4.97        | 3.70        | 846  | 62                    | 96         | 7                     | 0           |
| 6ed_29b_7ea 19 | 4          | 75         | 93            | 6             | 2             | 2             | 1           | -           | 4.92        | 3.68        | 867  | 67                    | 47         | 6                     | 0           |
| 6ed_29b_6ea 19 | 5          | 74         | 92            | 6             | 3             | 3             | 2           | -           | 4.78        | 3.44        | 865  | 66                    | 96         | 7                     | 0           |
| 6ed_29b_5ea 18 | 5          | 71         | 89            | 11            | 5             | 5             | 2           | -           | 4.91        | 3.68        | 880  | 70                    | 100        | 8                     | 0           |
| 6ed_29b_2ea 19 | 5          | 74         | 91            | 7             | 4             | 3             | 2           | -           | 4.88        | 3.73        | 866  | 66                    | 97         | 7                     | 0           |
| 6ed_29b_11ea19 | 5          | 73         | 91            | 8             | 4             | 3             | 2           | -           | 4.90        | 3.69        | 868  | 67                    | 98         | 7                     | 0           |
| 6ed_29b_10ea18 | 5          | 73         | 91            | 8             | 4             | 1             | 0           | -           | 4.90        | 3.70        | 844  | 61                    | 90         | 6                     | 0           |
| 6ed_28b_7ea 23 | 4          | 72         | 93            | 5             | 2             | 2             | 1           | -           | 4.90        | 3.64        | 872  | 68                    | 86         | 7                     | 0           |
| 6ed_28b_5ea 20 | 5          | 69         | 90            | 10            | 5             | 5             | 3           | -           | 4.85        | 3.61        | 900  | 75                    | 80         | 8                     | 0           |
| 6ed_28b_2ea 21 | 5          | 72         | 91            | 6             | 4             | 3             | 2           | -           | 4.90        | 3.85        | 875  | 69                    | 92         | 8                     | 0           |
| 5ed_29b_7ea 33 | 3          | 62         | 94            | 5             | 3             | 2             | 1           | -           | 4.95        | 3.81        | 826  | 57                    | 94         | 10                    | 0           |
| 5ed_28b_7ea 32 | 4          | 63         | 94            | 5             | 2             | 2             | 1           | -           | 4.90        | 3.66        | 832  | 58                    | 95         | 9                     | 0           |
| 3ed_29b_9ea 12 | 4          | 77         | 92            | 10            | 4             | 5             | 2           | -           | 4.99        | 3.80        | 860  | 65                    | 81         | 6                     | 0           |
| 3ed_29b_7ea 13 | 3          | 80         | 94            | 7             | 2             | 3             | 1           | -           | 4.97        | 3.85        | 854  | 64                    | 77         | 5                     | 0           |
| 3ed_29b_6ea 13 | 4          | 80         | 93            | 7             | 3             | 3             | 2           | -           | 4.88        | 3.57        | 836  | 59                    | 82         | 5                     | 0           |
| 3ed_29b_5ea 12 | 4          | 75         | 91            | 13            | 5             | 6             | 2           | -           | 5.07        | 3.85        | 841  | 60                    | 100        | 6                     | 0           |
| 3ed_29b_10ea13 | 4          | 78         | 92            | 9             | 4             | 1             | 0           | -           | 4.96        | 3.76        | 850  | 62                    | 86         | 5                     | 0           |
| 3ed_28b_7ea 15 | 3          | 79         | 94            | 6             | 3             | 2             | 1           | -           | 5.01        | 3.83        | 832  | 58                    | 95         | 5                     | 0           |
| 2ed_28b_7ea 19 | 3          | 76         | 94            | 5             | 3             | 2             | 1           | -           | 5.07        | 3.80        | 828  | 57                    | 88         | 6                     | 0           |
| 22ed_29b_7ea21 | 3          | 72         | 95            | 4             | 2             | 2             | 1           | -           | 5.07        | 3.83        | 850  | 62                    | 63         | 6                     | 0           |
| 22ed_28b_7ea25 | 3          | 69         | 94            | 4             | 2             | 1             | 1           | -           | 4.79        | 3.51        | 820  | 55                    | 87         | 8                     | 0           |
| 22ed_26b_11e20 | 2          | 78         | 96            | 0             | 2             | 0             | 0           | -           | 4.91        | 3.62        | 903  | 76                    | 84         | 6                     | 0           |
| 21ed_29b_9ea9  | 3          | 75         | 88            | 16            | 9             | 4             | 3           | -           | 5.04        | 3.60        | 823  | 56                    | 86         | 7                     | 0           |
|                |            |            |               |               |               |               |             |             | 5.03        | 3.83        |      |                       |            |                       |             |

|                 |   |    |    |    |   |   |   |      |      |     |    |     |    |   |
|-----------------|---|----|----|----|---|---|---|------|------|-----|----|-----|----|---|
| 21ed_29b_7ea11  | 3 | 82 | 94 | 7  | 3 | 3 | 1 | -    | -    | 800 | 50 | 96  | 4  | 0 |
| 21ed_29b_6ea9   | 3 | 83 | 94 | 7  | 3 | 3 | 1 | 5.05 | 3.68 | 805 | 51 | 92  | 4  | 0 |
| 21ed_29b_11ea0  | 3 | 81 | 92 | 9  | 5 | 2 | 2 | 5.12 | 3.81 | 816 | 54 | 87  | 5  | 0 |
| 21ed_29b_10ea9  | 3 | 81 | 92 | 10 | 4 | 1 | 0 | 5.08 | 3.83 | 815 | 54 | 92  | 5  | 0 |
| 21ed_28b_7ea10  | 3 | 84 | 95 | 6  | 3 | 2 | 1 | 5.07 | 3.81 | 835 | 59 | 96  | 4  | 0 |
| 20ed_29b_9ea16  | 3 | 68 | 87 | 13 | 9 | 3 | 2 | 4.99 | 3.68 | 854 | 64 | 91  | 9  | 0 |
| 20ed_29b_7ea17  | 3 | 75 | 94 | 6  | 3 | 2 | 1 | 4.92 | 3.82 | 845 | 61 | 79  | 6  | 0 |
| 20ed_29b_6ea18  | 3 | 73 | 93 | 6  | 3 | 3 | 1 | 4.86 | 3.58 | 832 | 58 | 81  | 6  | 0 |
| 20ed_29b_5ea16  | 3 | 71 | 91 | 12 | 5 | 6 | 3 | 5.03 | 3.85 | 837 | 59 | 100 | 7  | 0 |
| 20ed_29b_10ea8  | 3 | 71 | 92 | 8  | 4 | 1 | 0 | 4.94 | 3.77 | 842 | 61 | 87  | 7  | 0 |
| 20ed_28b_7ea18  | 3 | 75 | 94 | 6  | 2 | 2 | 1 | 4.98 | 3.83 | 837 | 59 | 100 | 6  | 0 |
| 1ed_29b_7ea22   | 4 | 72 | 94 | 6  | 3 | 2 | 1 | 4.99 | 3.74 | 829 | 57 | 99  | 7  | 0 |
| 19ed_29b_7ea9   | 3 | 84 | 95 | 7  | 3 | 3 | 1 | 5.00 | 3.78 | 818 | 55 | 94  | 4  | 0 |
| 17ed_29b_7ea13  | 4 | 80 | 94 | 7  | 2 | 3 | 1 | 5.09 | 3.81 | 813 | 53 | 89  | 5  | 0 |
| 16ed_29b_9ea17  | 5 | 70 | 87 | 13 | 8 | 3 | 2 | 5.08 | 3.82 | 860 | 65 | 98  | 9  | 0 |
| 16ed_29b_7ea19  | 4 | 75 | 93 | 6  | 3 | 2 | 1 | 4.93 | 3.78 | 833 | 58 | 93  | 6  | 0 |
| 16ed_29b_11ea8  | 5 | 74 | 91 | 8  | 4 | 2 | 1 | 4.97 | 3.66 | 821 | 55 | 95  | 7  | 0 |
| 16ed_29b_10ea8  | 5 | 73 | 91 | 8  | 4 | 1 | 0 | 5.04 | 3.80 | 847 | 62 | 91  | 7  | 0 |
| 16ed_28b_7ea24  | 3 | 71 | 94 | 5  | 3 | 2 | 1 | 5.00 | 3.81 | 831 | 58 | 87  | 8  | 0 |
| 13ed_29b_7ea24  | 5 | 70 | 93 | 6  | 2 | 2 | 1 | 5.05 | 3.83 | 828 | 57 | 88  | 7  | 0 |
| 11ed_29b_7ea35  | 5 | 60 | 92 | 5  | 3 | 2 | 1 | 5.02 | 3.83 | 843 | 61 | 92  | 10 | 0 |
| 10ed_29b_9ea22  | 4 | 68 | 91 | 9  | 5 | 4 | 2 | 4.94 | 3.81 | 846 | 61 | 91  | 8  | 0 |
| 10ed_29b_7ea20  | 3 | 73 | 94 | 6  | 3 | 2 | 1 | 4.95 | 3.81 | 846 | 61 | 79  | 7  | 0 |
| 10ed_29b_10ea21 | 4 | 69 | 92 | 8  | 4 | 1 | 0 | 4.86 | 3.58 | 845 | 61 | 88  | 8  | 0 |
| 10ed_28b_7ea23  | 3 | 70 | 94 | 5  | 3 | 2 | 1 | 4.97 | 3.82 | 839 | 60 | 100 | 7  | 0 |
|                 |   |    |    |    |   |   |   | 4.97 | 3.74 |     |    |     |    |   |

Table S7: The percentages and scoring for 600 to 800

| Name            | HOMO Donor | LUMO Donor | HOMO Backbone | LUMO Backbone | HOMO Acceptor | LUMO Acceptor | HOMO Anchor | LUMO Anchor | HOMO Energy | LUMO Energy | Wave | $\lambda_{max}$ Score | LUMO Score | Charge Transfer Score | Total Score |
|-----------------|------------|------------|---------------|---------------|---------------|---------------|-------------|-------------|-------------|-------------|------|-----------------------|------------|-----------------------|-------------|
| 10ed_16b_9ea32  | 11         | 34         | 74            | 32            | 14            | 9             | 4           | -           | -           | 755         | 39   | 100                   | 16         | 154                   |             |
| 23ed_9b_4ea64   | 13         | 22         | 38            | 10            | 48            | 3             | 13          | 5.14        | 3.74        | 641         | 10   | 99                    | 43         | 152                   |             |
| 23ed_20b_4ea67  | 16         | 19         | 47            | 11            | 35            | 3             | 9           | 5.18        | 3.72        | 706         | 26   | 90                    | 36         | 152                   |             |
| 6ed_8b_12ea27   | 8          | 36         | 41            | 36            | 50            | 12            | 12          | 5.08        | 3.82        | 665         | 16   | 100                   | 34         | 151                   |             |
| 22ed_16b_2ea44  | 12         | 40         | 79            | 12            | 8             | 6             | 4           | 5.36        | 3.75        | 746         | 36   | 99                    | 15         | 151                   |             |
| 10ed_20b_12ea33 | 11         | 28         | 47            | 37            | 39            | 12            | 10          | 5.24        | 3.71        | 681         | 20   | 100                   | 30         | 150                   |             |
| 5ed_16b_9ea46   | 11         | 28         | 72            | 26            | 17            | 7             | 4           | 5.28        | 3.74        | 753         | 38   | 89                    | 20         | 148                   |             |
| 9ed_9b_12ea60   | 15         | 20         | 35            | 17            | 50            | 5             | 12          | 5.14        | 3.82        | 638         | 9    | 95                    | 42         | 147                   |             |
| 20ed_16b_5ea30  | 9          | 39         | 79            | 27            | 9             | 13            | 5           | 5.30        | 3.80        | 780         | 45   | 89                    | 13         | 147                   |             |
| 2ed_9b_12ea20   | 9          | 40         | 37            | 40            | 54            | 12            | 13          | 5.21        | 3.82        | 642         | 11   | 99                    | 35         | 145                   |             |
| 6ed_1b_12ea27   | 12         | 30         | 53            | 42            | 34            | 13            | 8           | 5.47        | 3.72        | 683         | 21   | 98                    | 25         | 144                   |             |
| 20ed_16b_9ea32  | 9          | 39         | 80            | 24            | 9             | 11            | 4           | 5.36        | 3.70        | 725         | 31   | 99                    | 13         | 143                   |             |
| 9ed_20b_1ea68   | 18         | 20         | 48            | 9             | 33            | 3             | 11          | 5.29        | 3.78        | 643         | 11   | 96                    | 36         | 142                   |             |
| 23ed_20b_1ea72  | 15         | 18         | 48            | 6             | 35            | 2             | 11          | 5.20        | 3.68        | 650         | 13   | 92                    | 38         | 142                   |             |
| 23ed_1b_3ea77   | 21         | 15         | 63            | 4             | 16            | 2             | 8           | 5.09        | 3.65        | 664         | 16   | 97                    | 28         | 141                   |             |
| 5ed_16b_2ea60   | 12         | 30         | 78            | 10            | 9             | 5             | 4           | 5.19        | 3.79        | 693         | 23   | 97                    | 20         | 140                   |             |
| 11ed_20b_1ea73  | 18         | 17         | 48            | 7             | 32            | 2             | 11          | 5.26        | 3.69        | 624         | 6    | 97                    | 37         | 139                   |             |
| 5ed_9b_12ea43   | 8          | 30         | 35            | 26            | 57            | 8             | 14          | 5.30        | 3.79        | 621         | 5    | 91                    | 42         | 138                   |             |
| 11ed_1b_5ea67   | 18         | 19         | 65            | 12            | 15            | 6             | 7           | 5.37        | 3.64        | 658         | 15   | 97                    | 25         | 137                   |             |
| 5ed_20b_12ea49  | 12         | 22         | 47            | 27            | 40            | 9             | 10          | 5.25        | 3.68        | 677         | 19   | 83                    | 34         | 136                   |             |
| 11ed_26b_8ea91  | 1          | 5          | 75            | 0             | 23            | 0             | 14          | 5.28        | 3.84        | 626         | 7    | 93                    | 37         | 136                   |             |
| 7ed_1b_12ea18   | 12         | 31         | 61            | 51            | 27            | 16            | 6           | 5.36        | 3.65        | 667         | 17   | 100                   | 19         | 135                   |             |
|                 |            |            |               |               |               |               |             | 5.39        | 3.76        |             |      |                       |            |                       |             |



|                 |    |    |    |    |    |    |    |      |      |      |     |    |     |     |     |
|-----------------|----|----|----|----|----|----|----|------|------|------|-----|----|-----|-----|-----|
| 20ed_20b_4ea37  | 9  | 34 | 47 | 24 | 41 | 9  | 12 | -    | -    | 627  | 7   | 95 | 33  | 135 |     |
| 20ed_20b_12ea2  | 8  | 30 | 42 | 33 | 47 | 10 | 12 | 5.41 | 3.67 | 629  | 7   | 94 | 34  | 135 |     |
| 23ed_1b_1ea     | 72 | 17 | 18 | 54 | 6  | 28 | 2  | 8    | 5.40 | 3.66 | 680 | 20 | 80  | 34  | 134 |
| 11ed_1b_9ea     | 63 | 17 | 19 | 56 | 16 | 26 | 4  | 7    | 5.16 | 3.85 | 646 | 12 | 92  | 30  | 134 |
| 11ed_1b_3ea     | 77 | 20 | 15 | 66 | 5  | 14 | 2  | 6    | 5.22 | 3.65 | 623 | 6  | 100 | 28  | 133 |
| 1ed_20b_4ea     | 53 | 10 | 27 | 50 | 19 | 39 | 2  | 5    | 5.35 | 3.76 | 601 | 0  | 98  | 34  | 132 |
| 20ed_16b_2ea38  | 10 | 42 | 81 | 15 | 8  | 7  | 4  | 5.46 | 3.70 | 719  | 30  | 87 | 14  | 131 |     |
| 16ed_20b_4ea42  | 10 | 34 | 47 | 23 | 41 | 8  | 12 | 5.41 | 3.83 | 617  | 4   | 93 | 34  | 131 |     |
| 6ed_1b_4ea      | 36 | 12 | 36 | 56 | 27 | 31 | 10 | 9    | 5.52 | 3.66 | 654 | 14 | 90  | 27  | 130 |
| 5ed_20b_4ea     | 61 | 11 | 23 | 52 | 15 | 36 | 2  | 5    | 5.45 | 3.64 | 624 | 6  | 91  | 34  | 130 |
| 13ed_1b_5ea     | 62 | 16 | 23 | 66 | 15 | 16 | 7  | 9    | 5.30 | 3.64 | 642 | 11 | 94  | 25  | 130 |
| 10ed_20b_4ea43  | 10 | 32 | 50 | 22 | 38 | 8  | 11 | 5.35 | 3.67 | 629  | 7   | 90 | 32  | 130 |     |
| 11ed_1b_11ea73  | 20 | 17 | 68 | 8  | 12 | 3  | 5  | 5.39 | 3.64 | 621  | 5   | 98 | 25  | 129 |     |
| 23ed_20b_8ea74  | 24 | 15 | 56 | 7  | 17 | 7  | 11 | 5.34 | 3.70 | 659  | 15  | 84 | 29  | 128 |     |
| 16ed_9b_12ea30  | 9  | 36 | 35 | 33 | 56 | 10 | 13 | 5.24 | 3.84 | 616  | 4   | 86 | 38  | 128 |     |
| 2ed_20b_4ea     | 32 | 10 | 39 | 51 | 28 | 39 | 10 | 11   | 5.48 | 3.61 | 617 | 4  | 93  | 30  | 127 |
| 2ed_20b_12ea26  | 9  | 34 | 43 | 40 | 46 | 12 | 11 | 5.57 | 3.66 | 617  | 4   | 91 | 32  | 127 |     |
| 22ed_20b_4ea44  | 10 | 33 | 45 | 19 | 43 | 6  | 12 | 5.53 | 3.64 | 652  | 13  | 79 | 35  | 127 |     |
| 1ed_20b_12ea50  | 10 | 25 | 43 | 25 | 46 | 7  | 12 | 5.25 | 3.58 | 613  | 3   | 86 | 38  | 127 |     |
| 9ed_26b_8ea     | 85 | 1  | 11 | 76 | 0  | 23 | 0  | 14   | 5.49 | 3.83 | 624 | 6  | 85  | 36  | 126 |
| 22ed_1b_8ea     | 53 | 15 | 29 | 67 | 13 | 17 | 13 | 11   | 5.31 | 3.61 | 606 | 1  | 100 | 24  | 125 |
| 11ed_20b_3ea75  | 20 | 16 | 60 | 5  | 18 | 3  | 7  | 5.57 | 3.74 | 602  | 1   | 96 | 29  | 125 |     |
| 10ed_1b_1ea     | 52 | 10 | 32 | 56 | 13 | 33 | 4  | 11   | 5.35 | 3.68 | 604 | 1  | 93  | 32  | 125 |
| 16ed_1b_1ea     | 51 | 11 | 34 | 57 | 15 | 32 | 4  | 11   | 5.49 | 3.65 | 602 | 1  | 92  | 31  | 124 |
| 3ed_1b_4ea      | 21 | 11 | 41 | 64 | 38 | 24 | 14 | 7    | 5.63 | 3.65 | 629 | 7  | 95  | 19  | 121 |
| 16ed_20b_12ea36 | 10 | 30 | 43 | 33 | 46 | 10 | 11 | 5.62 | 3.80 | 611  | 3   | 83 | 34  | 120 |     |
| 22ed_1b_1ea     | 51 | 10 | 33 | 53 | 11 | 36 | 3  | 11   | 5.50 | 3.60 | 625 | 6  | 79  | 33  | 119 |
| 7ed_1b_4ea      | 25 | 13 | 39 | 65 | 35 | 21 | 12 | 6    | 5.35 | 3.58 | 636 | 9  | 88  | 18  | 115 |
| 6ed_26b_8ea     | 43 | 1  | 53 | 75 | 2  | 23 | 2  | 14   | 5.50 | 3.62 | 619 | 5  | 85  | 25  | 115 |
| 21ed_16b_5ea14  | 11 | 51 | 77 | 34 | 11 | 17 | 5  | 5.18 | 3.61 | 662  | 16  | 89 | 10  | 114 |     |
| 23ed_1b_2ea     | 77 | 20 | 15 | 66 | 4  | 14 | 2  | 7    | 5.52 | 3.63 | 652 | 13 | 73  | 27  | 113 |
| 9ed_1b_9ea      | 59 | 18 | 21 | 55 | 18 | 27 | 5  | 7    | 5.10 | 3.55 | 659 | 15 | 67  | 30  | 111 |
| 14ed_8b_9ea     | 92 | 4  | 1  | 26 | 2  | 69 | 0  | 4    | 5.12 | 3.53 | 707 | 27 | 26  | 58  | 111 |
| 9ed_1b_11ea     | 69 | 21 | 20 | 67 | 9  | 12 | 3  | 5    | 5.42 | 3.34 | 636 | 9  | 76  | 24  | 109 |
| 3ed_20b_4ea     | 20 | 10 | 42 | 59 | 37 | 29 | 14 | 8    | 5.23 | 3.57 | 620 | 5  | 81  | 21  | 107 |
| 1ed_26b_8ea     | 3  | 1  | 91 | 75 | 5  | 24 | 4  | 14   | 5.49 | 3.59 | 626 | 7  | 84  | 16  | 107 |
| 3ed_9b_12ea     | 16 | 9  | 40 | 38 | 43 | 53 | 13 | 12   | 5.29 | 3.60 | 620 | 5  | 68  | 33  | 106 |
| 21ed_16b_9ea12  | 8  | 43 | 66 | 44 | 25 | 13 | 5  | 5.44 | 3.53 | 639  | 10  | 80 | 16  | 106 |     |
| 3ed_20b_12ea17  | 10 | 34 | 48 | 49 | 40 | 15 | 10 | 5.45 | 3.58 | 619  | 5   | 74 | 26  | 105 |     |
| 21ed_16b_2ea20  | 10 | 60 | 80 | 19 | 9  | 9  | 5  | 5.44 | 3.56 | 606  | 1   | 92 | 11  | 104 |     |
| 11ed_1b_2ea     | 76 | 19 | 17 | 68 | 5  | 12 | 2  | 5    | 5.82 | 3.65 | 618 | 4  | 72  | 26  | 102 |
| 3ed_26b_8ea     | 9  | 1  | 87 | 74 | 4  | 24 | 3  | 14   | 5.28 | 3.55 | 612 | 3  | 79  | 17  | 100 |
| 23ed_20b_3ea75  | 19 | 16 | 60 | 4  | 19 | 2  | 10 | 5.29 | 3.58 | 629  | 7   | 63 | 30  | 100 |     |
| 23ed_1b_9ea     | 64 | 18 | 20 | 57 | 13 | 25 | 3  | 6    | 5.13 | 3.51 | 667 | 17 | 53  | 30  | 100 |
| 6ed_9b_12ea     | 28 | 10 | 36 | 36 | 34 | 53 | 11 | 13   | 5.02 | 3.47 | 638 | 10 | 52  | 37  | 99  |
| 7ed_26b_8ea     | 17 | 1  | 79 | 73 | 3  | 24 | 2  | 14   | 5.33 | 3.47 | 618 | 5  | 73  | 20  | 97  |
| 6ed_20b_12ea31  | 11 | 32 | 43 | 36 | 45 | 11 | 11 | 5.21 | 3.55 | 642  | 11  | 51 | 32  | 94  |     |
| 9ed_1b_6ea      | 71 | 19 | 20 | 70 | 6  | 10 | 3  | 5    | 5.34 | 3.46 | 631 | 8  | 61  | 24  | 93  |
| 2ed_26b_8ea     | 17 | 1  | 79 | 76 | 3  | 22 | 3  | 22   | 5.23 | 3.50 | 603 | 1  | 71  | 20  | 92  |
| 6ed_20b_4ea     | 36 | 12 | 36 | 53 | 27 | 34 | 10 | 10   | 5.30 | 3.54 | 649 | 12 | 51  | 28  | 91  |
| 10ed_26b_8ea5   | 1  | 90 | 73 | 4  | 26 | 3  | 15 | 5.35 | 3.46 | 632  | 8   | 64 | 17  | 89  |     |
| 6ed_9b_4ea      | 37 | 8  | 41 | 31 | 21 | 61 | 7  | 18   | 5.24 | 3.51 | 601 | 0  | 41  | 44  | 85  |
| 23ed_1b_6ea     | 74 | 19 | 18 | 69 | 5  | 11 | 2  | 5    | 5.38 | 3.41 | 640 | 10 | 49  | 25  | 84  |
|                 |    |    |    |    |    |    |    |      | 5.12 | 3.45 |     |    |     |     |     |

|              |    |    |    |    |    |    |    |    |      |      |     |    |    |    |    |
|--------------|----|----|----|----|----|----|----|----|------|------|-----|----|----|----|----|
| 7ed_9b_12ea  | 19 | 9  | 38 | 38 | 43 | 52 | 13 | 12 | -    | -    | 635 | 9  | 41 | 33 | 83 |
| 7ed_20b_12ea | 20 | 11 | 33 | 48 | 47 | 38 | 15 | 9  | 5.32 | 3.42 | 633 | 8  | 47 | 26 | 82 |
| 22ed_13b_9ea | 40 | 3  | 32 | 15 | 24 | 82 | 0  | 7  | 5.32 | 3.44 | 702 | 26 | 5  | 52 | 82 |
| 22ed_11b_9ea | 38 | 4  | 29 | 12 | 29 | 83 | 0  | 8  | 5.28 | 3.13 | 700 | 25 | 0  | 53 | 78 |
| 20ed_17b_9ea | 29 | 2  | 26 | 5  | 41 | 93 | 0  | 9  | 5.04 | 2.67 | 691 | 23 | 0  | 56 | 78 |
| 11ed_20b_9ea | 68 | 20 | 20 | 62 | 10 | 16 | 5  | 7  | 5.27 | 2.88 | 621 | 5  | 47 | 26 | 78 |
| 6ed_1b_1ea   | 44 | 12 | 38 | 56 | 17 | 32 | 5  | 11 | 5.16 | 3.44 | 615 | 4  | 43 | 29 | 76 |
| 20ed_7b_9ea  | 26 | 2  | 23 | 8  | 48 | 89 | 0  | 11 | 5.47 | 3.43 | 688 | 22 | 0  | 53 | 76 |
| 16ed_17b_9ea | 26 | 3  | 27 | 8  | 47 | 89 | 0  | 8  | 5.37 | 2.91 | 693 | 23 | 0  | 52 | 76 |
| 7ed_20b_4ea  | 25 | 11 | 40 | 58 | 35 | 29 | 13 | 8  | 5.30 | 2.86 | 626 | 7  | 46 | 22 | 75 |
| 6ed_8b_9ea   | 30 | 6  | 40 | 33 | 29 | 60 | 8  | 18 | 5.37 | 3.44 | 716 | 29 | 4  | 42 | 75 |
| 16ed_6b_9ea  | 23 | 1  | 43 | 14 | 34 | 84 | 0  | 7  | 5.17 | 3.11 | 694 | 23 | 1  | 49 | 74 |
| 19ed_9b_9ea  | 8  | 5  | 36 | 24 | 56 | 71 | 0  | 5  | 5.24 | 3.00 | 711 | 28 | 7  | 38 | 73 |
| 19ed_12b_9ea | 8  | 3  | 27 | 6  | 65 | 91 | 0  | 9  | 5.36 | 3.18 | 694 | 24 | 0  | 49 | 73 |
| 9ed_20b_3ea  | 71 | 21 | 19 | 59 | 7  | 18 | 3  | 7  | 5.43 | 2.86 | 623 | 6  | 38 | 28 | 72 |
| 9ed_1b_2ea   | 71 | 20 | 20 | 67 | 6  | 12 | 3  | 5  | 5.18 | 3.40 | 632 | 8  | 39 | 25 | 72 |
| 22ed_1b_3ea  | 55 | 13 | 31 | 69 | 8  | 18 | 4  | 9  | 5.17 | 3.41 | 605 | 1  | 46 | 24 | 72 |
| 22ed_14b_9ea | 48 | 4  | 22 | 19 | 25 | 76 | 0  | 6  | 5.42 | 3.44 | 682 | 21 | 0  | 51 | 72 |
| 21ed_10b_9ea | 8  | 2  | 48 | 13 | 43 | 86 | 0  | 7  | 5.19 | 2.84 | 702 | 26 | 0  | 46 | 72 |
| 20ed_3b_9ea  | 21 | 1  | 53 | 21 | 24 | 79 | 0  | 6  | 5.12 | 2.86 | 686 | 21 | 6  | 45 | 72 |
| 17ed_6b_9ea  | 11 | 2  | 43 | 15 | 46 | 83 | 0  | 6  | 5.32 | 3.15 | 696 | 24 | 3  | 45 | 72 |
| 21ed_13b_9ea | 9  | 2  | 33 | 12 | 57 | 86 | 0  | 7  | 5.34 | 3.08 | 691 | 23 | 1  | 47 | 70 |
| 11ed_20b_5ea | 64 | 20 | 21 | 60 | 13 | 17 | 6  | 9  | 5.41 | 2.97 | 629 | 7  | 36 | 26 | 70 |
| 9ed_20b_5ea  | 60 | 20 | 23 | 59 | 14 | 17 | 7  | 9  | 5.19 | 3.39 | 654 | 13 | 30 | 25 | 69 |
| 7ed_1b_1ea   | 32 | 12 | 44 | 65 | 23 | 23 | 8  | 8  | 5.09 | 3.36 | 608 | 2  | 46 | 21 | 69 |
| 21ed_2b_9ea  | 8  | 1  | 43 | 15 | 49 | 84 | 0  | 7  | 5.52 | 3.44 | 690 | 23 | 1  | 45 | 69 |
| 13ed_20b_9ea | 53 | 15 | 25 | 49 | 22 | 34 | 6  | 10 | 5.38 | 3.01 | 600 | 0  | 37 | 32 | 69 |
| 2ed_26b_9ea  | 8  | 1  | 80 | 61 | 11 | 37 | 3  | 12 | 5.27 | 3.40 | 624 | 6  | 33 | 23 | 62 |
| 13ed_20b_5ea | 62 | 17 | 25 | 63 | 12 | 17 | 6  | 9  | 5.10 | 3.38 | 608 | 2  | 35 | 26 | 62 |
| 23ed_20b_9ea | 63 | 17 | 21 | 54 | 13 | 27 | 3  | 8  | 5.31 | 3.39 | 645 | 11 | 18 | 31 | 60 |
| 9ed_20b_9ea  | 53 | 19 | 25 | 48 | 21 | 31 | 6  | 9  | 4.95 | 3.29 | 632 | 8  | 20 | 31 | 58 |
| 3ed_21b_9ea  | 23 | 5  | 28 | 40 | 48 | 54 | 16 | 17 | 5.05 | 3.30 | 685 | 21 | 0  | 36 | 58 |
| 9ed_20b_11ea | 67 | 22 | 21 | 61 | 9  | 15 | 3  | 6  | 5.46 | 2.91 | 618 | 4  | 28 | 25 | 57 |
| 23ed_20b_5ea | 65 | 18 | 21 | 62 | 10 | 16 | 5  | 8  | 5.17 | 3.35 | 658 | 14 | 16 | 26 | 56 |
| 23ed_20b_2ea | 74 | 19 | 18 | 64 | 5  | 15 | 2  | 8  | 4.98 | 3.27 | 628 | 7  | 18 | 27 | 53 |
| 1ed_26b_9ea  | 2  | 1  | 85 | 59 | 13 | 40 | 3  | 13 | 5.04 | 3.29 | 622 | 5  | 21 | 23 | 49 |
| 5ed_1b_5ea   | 62 | 11 | 24 | 71 | 14 | 16 | 7  | 8  | 5.07 | 3.31 | 603 | 1  | 20 | 25 | 46 |
| 9ed_20b_6ea  | 69 | 20 | 22 | 67 | 7  | 11 | 3  | 6  | 5.28 | 3.30 | 615 | 4  | 17 | 24 | 44 |
| 2ed_26b_11ea | 11 | 2  | 83 | 82 | 5  | 16 | 2  | 7  | 5.16 | 3.28 | 611 | 3  | 29 | 12 | 44 |
| 16ed_1b_5ea  | 49 | 11 | 33 | 72 | 19 | 15 | 9  | 8  | 5.20 | 3.36 | 602 | 1  | 20 | 21 | 42 |
| 2ed_1b_5ea   | 36 | 10 | 40 | 72 | 24 | 16 | 12 | 9  | 5.48 | 3.30 | 606 | 2  | 21 | 19 | 41 |
| 3ed_26b_11ea | 7  | 2  | 87 | 82 | 6  | 16 | 2  | 7  | 5.53 | 3.31 | 613 | 3  | 24 | 11 | 38 |
| 22ed_1b_9ea  | 42 | 10 | 32 | 56 | 22 | 32 | 5  | 8  | 5.17 | 3.33 | 617 | 4  | 6  | 28 | 38 |
| 10ed_1b_5ea  | 45 | 11 | 33 | 70 | 20 | 17 | 10 | 9  | 5.14 | 3.15 | 620 | 5  | 11 | 21 | 37 |
| 9ed_26b_11ea | 30 | 1  | 64 | 81 | 4  | 17 | 1  | 7  | 5.28 | 3.22 | 609 | 2  | 17 | 17 | 36 |
| 20ed_1b_5ea  | 37 | 9  | 35 | 72 | 22 | 16 | 11 | 8  | 5.18 | 3.28 | 609 | 2  | 13 | 19 | 34 |
| 9ed_20b_2ea  | 70 | 21 | 21 | 62 | 7  | 15 | 3  | 6  | 5.35 | 3.24 | 606 | 1  | 5  | 26 | 33 |
| 6ed_26b_9ea  | 34 | 2  | 61 | 79 | 4  | 18 | 2  | 9  | 5.11 | 3.14 | 608 | 2  | 12 | 19 | 33 |
| 22ed_1b_5ea  | 45 | 12 | 34 | 69 | 17 | 16 | 8  | 8  | 5.07 | 3.24 | 631 | 8  | 5  | 21 | 33 |
| 6ed_1b_5ea   | 39 | 12 | 37 | 73 | 23 | 13 | 11 | 7  | 5.18 | 3.14 | 632 | 8  | 6  | 17 | 31 |
| 3ed_26b_9ea  | 6  | 1  | 86 | 79 | 7  | 18 | 3  | 9  | 5.34 | 3.15 | 613 | 3  | 16 | 12 | 31 |
| 10ed_26b_9ea | 3  | 1  | 85 | 57 | 12 | 42 | 3  | 12 | 5.14 | 3.27 | 608 | 2  | 4  | 24 | 31 |
| 1ed_26b_11ea | 3  | 1  | 90 | 81 | 6  | 17 | 2  | 7  | 5.06 | 3.12 | 607 | 2  | 16 | 11 | 29 |
|              |    |    |    |    |    |    |    |    | 5.17 | 3.27 |     |    |    |    |    |

|               |    |    |    |    |    |    |    |    |      |      |     |    |     |    |    |
|---------------|----|----|----|----|----|----|----|----|------|------|-----|----|-----|----|----|
| 7ed_26b_9ea   | 13 | 2  | 81 | 78 | 5  | 18 | 2  | 9  | -    | -    | 617 | 4  | 9   | 14 | 28 |
| 5ed_26b_9ea   | 4  | 1  | 88 | 78 | 7  | 20 | 3  | 10 | 5.06 | 3.20 | 609 | 2  | 7   | 13 | 22 |
| 5ed_26b_11ea  | 2  | 1  | 90 | 82 | 7  | 17 | 2  | 8  | 5.10 | 3.17 | 610 | 3  | 10  | 10 | 22 |
| 22ed_20b_5ea  | 44 | 12 | 35 | 64 | 17 | 19 | 8  | 9  | 5.13 | 3.21 | 600 | 0  | 0   | 22 | 22 |
| 10ed_26b_11ea | 4  | 1  | 90 | 81 | 6  | 18 | 2  | 8  | 5.09 | 2.84 | 609 | 2  | 9   | 12 | 22 |
| 6ed_20b_5ea   | 39 | 11 | 37 | 71 | 23 | 14 | 11 | 8  | 5.10 | 3.20 | 610 | 3  | 1   | 18 | 21 |
| 3ed_1b_5ea    | 22 | 11 | 44 | 78 | 34 | 9  | 17 | 5  | 5.26 | 2.94 | 613 | 3  | 7   | 11 | 21 |
| 7ed_1b_5ea    | 26 | 11 | 42 | 78 | 31 | 9  | 16 | 5  | 5.41 | 3.17 | 623 | 6  | 1   | 12 | 19 |
| 7ed_20b_5ea   | 25 | 11 | 43 | 74 | 31 | 11 | 15 | 6  | 5.29 | 3.02 | 601 | 0  | 0   | 13 | 13 |
| 9ed_31b_7ea   | 67 | 3  | 29 | 95 | 1  | 2  | 0  | 0  | 5.18 | 2.76 | 703 | 26 | 100 | 18 | 0  |
| 9ed_20b_10ea  | 66 | 22 | 22 | 61 | 10 | 15 | 1  | 2  | 5.12 | 3.75 | 610 | 2  | 10  | 25 | 0  |
| 9ed_1b_7ea    | 68 | 19 | 22 | 73 | 7  | 8  | 3  | 3  | 5.12 | 3.21 | 619 | 5  | 4   | 22 | 0  |
| 7ed_35b_7ea   | 20 | 1  | 79 | 98 | 1  | 1  | 0  | 0  | 5.09 | 3.11 | 702 | 26 | 86  | 5  | 0  |
| 7ed_34b_7ea   | 19 | 2  | 79 | 97 | 2  | 1  | 1  | 0  | 5.24 | 3.83 | 708 | 27 | 100 | 5  | 0  |
| 7ed_33b_6ea   | 23 | 2  | 75 | 97 | 2  | 1  | 1  | 1  | 5.22 | 3.74 | 731 | 33 | 91  | 6  | 0  |
| 7ed_33b_5ea   | 21 | 2  | 75 | 96 | 4  | 3  | 2  | 1  | 5.25 | 3.82 | 737 | 34 | 94  | 7  | 0  |
| 7ed_33b_2ea   | 23 | 2  | 74 | 96 | 2  | 2  | 1  | 1  | 5.21 | 3.80 | 731 | 33 | 98  | 7  | 0  |
| 7ed_33b_10ea  | 22 | 2  | 75 | 96 | 3  | 2  | 0  | 0  | 5.22 | 3.79 | 735 | 34 | 87  | 6  | 0  |
| 7ed_32b_9ea   | 22 | 4  | 65 | 89 | 12 | 7  | 3  | 2  | 5.24 | 3.83 | 701 | 25 | 95  | 10 | 0  |
| 7ed_32b_7ea   | 25 | 3  | 71 | 96 | 3  | 2  | 1  | 0  | 5.34 | 3.80 | 688 | 22 | 76  | 7  | 0  |
| 7ed_32b_6ea   | 27 | 3  | 69 | 95 | 3  | 3  | 1  | 1  | 5.31 | 3.57 | 687 | 22 | 99  | 8  | 0  |
| 7ed_32b_5ea   | 23 | 3  | 68 | 92 | 8  | 5  | 4  | 3  | 5.42 | 3.77 | 702 | 25 | 94  | 9  | 0  |
| 7ed_32b_2ea   | 27 | 3  | 69 | 92 | 3  | 4  | 1  | 2  | 5.36 | 3.81 | 689 | 22 | 100 | 9  | 0  |
| 7ed_32b_10ea  | 24 | 3  | 69 | 93 | 6  | 3  | 0  | 0  | 5.37 | 3.73 | 698 | 24 | 88  | 8  | 0  |
| 7ed_31b_9ea   | 23 | 3  | 70 | 93 | 6  | 3  | 3  | 1  | 5.39 | 3.83 | 750 | 38 | 93  | 8  | 0  |
| 7ed_31b_7ea   | 23 | 3  | 73 | 96 | 3  | 1  | 1  | 0  | 5.24 | 3.81 | 741 | 35 | 67  | 7  | 0  |
| 7ed_31b_6ea   | 24 | 3  | 72 | 94 | 3  | 2  | 1  | 1  | 5.15 | 3.53 | 739 | 35 | 100 | 7  | 0  |
| 7ed_31b_5ea   | 22 | 3  | 70 | 92 | 8  | 4  | 4  | 2  | 5.26 | 3.74 | 754 | 38 | 100 | 8  | 0  |
| 7ed_31b_3ea   | 25 | 3  | 71 | 92 | 4  | 4  | 2  | 2  | 5.20 | 3.75 | 744 | 36 | 90  | 9  | 0  |
| 7ed_31b_2ea   | 23 | 3  | 73 | 93 | 4  | 3  | 2  | 1  | 5.27 | 3.82 | 742 | 36 | 96  | 8  | 0  |
| 7ed_31b_11ea  | 23 | 3  | 71 | 94 | 6  | 3  | 2  | 1  | 5.20 | 3.68 | 747 | 37 | 84  | 8  | 0  |
| 7ed_31b_10ea  | 23 | 3  | 71 | 94 | 6  | 3  | 0  | 0  | 5.27 | 3.84 | 750 | 37 | 97  | 7  | 0  |
| 7ed_26b_10ea  | 13 | 2  | 81 | 80 | 5  | 17 | 0  | 2  | 5.24 | 3.79 | 615 | 4  | 9   | 12 | 0  |
| 7ed_16b_9ea   | 22 | 10 | 44 | 71 | 32 | 19 | 15 | 2  | 5.07 | 3.20 | 722 | 30 | 80  | 15 | 0  |
| 7ed_16b_7ea   | 34 | 7  | 50 | 88 | 15 | 5  | 6  | 2  | 5.28 | 3.58 | 714 | 28 | 44  | 11 | 0  |
| 7ed_16b_6ea   | 27 | 12 | 52 | 84 | 20 | 4  | 9  | 2  | 5.34 | 3.43 | 738 | 34 | 88  | 9  | 0  |
| 7ed_16b_3ea   | 26 | 13 | 52 | 83 | 21 | 4  | 10 | 2  | 5.37 | 3.62 | 696 | 24 | 96  | 9  | 0  |
| 7ed_16b_2ea   | 30 | 11 | 52 | 84 | 18 | 5  | 8  | 2  | 5.50 | 3.68 | 710 | 28 | 77  | 10 | 0  |
| 7ed_16b_11ea  | 24 | 11 | 48 | 77 | 27 | 12 | 9  | 1  | 5.43 | 3.57 | 715 | 29 | 96  | 12 | 0  |
| 7ed_16b_10ea  | 28 | 7  | 47 | 66 | 24 | 26 | 2  | 0  | 5.37 | 3.68 | 714 | 29 | 97  | 20 | 0  |
| 6ed_35b_7ea   | 36 | 1  | 62 | 98 | 1  | 1  | 0  | 0  | 5.40 | 3.69 | 695 | 24 | 90  | 9  | 0  |
| 6ed_34b_7ea   | 31 | 2  | 67 | 97 | 2  | 1  | 0  | 0  | 5.19 | 3.82 | 706 | 27 | 100 | 8  | 0  |
| 6ed_33b_9ea   | 36 | 2  | 60 | 96 | 3  | 3  | 1  | 1  | 5.16 | 3.74 | 758 | 40 | 94  | 11 | 0  |
| 6ed_33b_6ea   | 40 | 2  | 58 | 97 | 1  | 1  | 0  | 1  | 5.13 | 3.80 | 722 | 31 | 87  | 11 | 0  |
| 6ed_33b_3ea   | 40 | 2  | 58 | 95 | 1  | 3  | 1  | 1  | 5.20 | 3.83 | 724 | 31 | 88  | 12 | 0  |
| 6ed_33b_10ea  | 38 | 2  | 59 | 96 | 2  | 2  | 0  | 0  | 5.18 | 3.83 | 729 | 32 | 90  | 10 | 0  |
| 6ed_32b_9ea   | 35 | 4  | 56 | 87 | 8  | 9  | 2  | 3  | 5.17 | 3.82 | 717 | 29 | 98  | 14 | 0  |
| 6ed_32b_7ea   | 41 | 3  | 56 | 95 | 2  | 2  | 1  | 1  | 5.22 | 3.78 | 689 | 22 | 73  | 11 | 0  |
| 6ed_32b_6ea   | 42 | 3  | 55 | 94 | 2  | 2  | 1  | 1  | 5.21 | 3.55 | 689 | 22 | 100 | 12 | 0  |
| 6ed_32b_5ea   | 34 | 4  | 59 | 89 | 6  | 7  | 3  | 3  | 5.31 | 3.75 | 706 | 27 | 95  | 13 | 0  |
| 6ed_32b_3ea   | 41 | 4  | 55 | 91 | 3  | 5  | 1  | 2  | 5.27 | 3.80 | 696 | 24 | 87  | 14 | 0  |
| 6ed_32b_2ea   | 41 | 4  | 56 | 91 | 3  | 5  | 1  | 2  | 5.32 | 3.83 | 670 | 17 | 93  | 13 | 0  |
| 6ed_32b_11ea  | 40 | 4  | 55 | 92 | 4  | 4  | 1  | 2  | 5.28 | 3.66 | 682 | 20 | 84  | 13 | 0  |
|               |    |    |    |    |    |    |    |    | 5.34 | 3.84 |     |    |     |    |    |

|                 |    |    |    |    |    |    |    |      |      |     |    |     |    |   |
|-----------------|----|----|----|----|----|----|----|------|------|-----|----|-----|----|---|
| 6ed_32b_10ea40  | 4  | 55 | 93 | 4  | 4  | 0  | 0  | -    | -    | 700 | 25 | 93  | 12 | 0 |
| 6ed_31b_9ea 32  | 4  | 59 | 90 | 9  | 6  | 2  | 2  | 5.30 | 3.81 | 756 | 39 | 100 | 11 | 0 |
| 6ed_31b_7ea 36  | 3  | 60 | 95 | 3  | 1  | 1  | 0  | 5.12 | 3.74 | 741 | 35 | 72  | 10 | 0 |
| 6ed_31b_6ea 38  | 3  | 59 | 94 | 3  | 2  | 1  | 1  | 5.09 | 3.55 | 741 | 35 | 100 | 11 | 0 |
| 6ed_31b_5ea 33  | 4  | 60 | 92 | 6  | 4  | 3  | 2  | 5.18 | 3.73 | 756 | 39 | 100 | 11 | 0 |
| 6ed_31b_3ea 36  | 4  | 60 | 92 | 3  | 4  | 1  | 2  | 5.13 | 3.74 | 745 | 36 | 98  | 12 | 0 |
| 6ed_31b_2ea 35  | 4  | 61 | 93 | 3  | 3  | 1  | 1  | 5.18 | 3.78 | 743 | 36 | 92  | 11 | 0 |
| 6ed_31b_10ea35  | 4  | 60 | 93 | 5  | 3  | 0  | 0  | 5.13 | 3.65 | 752 | 38 | 100 | 10 | 0 |
| 6ed_26b_10ea35  | 2  | 60 | 81 | 4  | 16 | 0  | 2  | 5.16 | 3.77 | 605 | 1  | 10  | 17 | 0 |
| 6ed_18b_9ea 44  | 8  | 20 | 51 | 35 | 41 | 0  | 2  | 5.12 | 3.22 | 684 | 21 | 55  | 32 | 0 |
| 6ed_16b_9ea 32  | 7  | 42 | 50 | 25 | 43 | 12 | 2  | 5.44 | 3.48 | 737 | 34 | 57  | 30 | 0 |
| 6ed_16b_7ea 41  | 11 | 44 | 84 | 14 | 5  | 5  | 2  | 5.23 | 3.48 | 748 | 37 | 16  | 13 | 0 |
| 6ed_16b_6ea 39  | 12 | 45 | 81 | 15 | 7  | 7  | 2  | 5.16 | 3.27 | 748 | 37 | 81  | 14 | 0 |
| 6ed_16b_3ea 35  | 15 | 47 | 79 | 18 | 6  | 8  | 2  | 5.34 | 3.59 | 722 | 31 | 71  | 12 | 0 |
| 6ed_16b_2ea 36  | 14 | 47 | 80 | 17 | 5  | 8  | 2  | 5.39 | 3.54 | 734 | 34 | 30  | 12 | 0 |
| 6ed_16b_11ea34  | 7  | 43 | 50 | 22 | 42 | 7  | 1  | 5.26 | 3.36 | 733 | 33 | 80  | 30 | 0 |
| 6ed_16b_10ea34  | 7  | 43 | 51 | 23 | 42 | 2  | 0  | 5.31 | 3.58 | 743 | 36 | 62  | 29 | 0 |
| 5ed_33b_7ea 72  | 1  | 27 | 98 | 1  | 1  | 0  | 0  | 5.24 | 3.51 | 692 | 23 | 100 | 18 | 0 |
| 5ed_32b_2ea 78  | 3  | 20 | 92 | 1  | 5  | 0  | 2  | 5.24 | 3.75 | 616 | 4  | 84  | 22 | 0 |
| 5ed_32b_10ea75  | 3  | 22 | 93 | 1  | 4  | 0  | 1  | 5.37 | 3.84 | 612 | 3  | 94  | 21 | 0 |
| 5ed_31b_7ea 70  | 2  | 28 | 97 | 1  | 1  | 0  | 0  | 5.37 | 3.81 | 687 | 22 | 98  | 18 | 0 |
| 5ed_26b_10ea3   | 1  | 90 | 80 | 7  | 19 | 0  | 2  | 5.24 | 3.70 | 607 | 2  | 5   | 11 | 0 |
| 5ed_16b_7ea 59  | 10 | 30 | 84 | 10 | 6  | 4  | 2  | 5.09 | 3.14 | 725 | 31 | 63  | 18 | 0 |
| 5ed_16b_10ea56  | 11 | 29 | 80 | 14 | 8  | 1  | 1  | 5.12 | 3.51 | 726 | 31 | 94  | 18 | 0 |
| 3ed_34b_7ea 15  | 2  | 83 | 97 | 2  | 1  | 1  | 0  | 5.23 | 3.80 | 702 | 26 | 92  | 4  | 0 |
| 3ed_32b_7ea 22  | 3  | 74 | 95 | 4  | 2  | 1  | 0  | 5.29 | 3.81 | 681 | 20 | 91  | 6  | 0 |
| 3ed_31b_7ea 19  | 3  | 77 | 96 | 4  | 1  | 1  | 0  | 5.39 | 3.64 | 732 | 33 | 87  | 6  | 0 |
| 3ed_31b_6ea 20  | 3  | 76 | 95 | 3  | 2  | 1  | 1  | 5.23 | 3.62 | 730 | 32 | 87  | 6  | 0 |
| 3ed_26b_10ea4   | 2  | 87 | 82 | 8  | 15 | 1  | 2  | 5.35 | 3.83 | 606 | 2  | 12  | 9  | 0 |
| 3ed_16b_9ea 19  | 9  | 45 | 75 | 35 | 16 | 16 | 2  | 5.18 | 3.23 | 706 | 26 | 100 | 13 | 0 |
| 3ed_16b_7ea 24  | 10 | 55 | 87 | 21 | 3  | 8  | 1  | 5.40 | 3.73 | 741 | 35 | 37  | 8  | 0 |
| 3ed_16b_6ea 23  | 10 | 55 | 87 | 22 | 3  | 10 | 2  | 5.26 | 3.40 | 723 | 31 | 99  | 8  | 0 |
| 3ed_16b_3ea 22  | 11 | 55 | 84 | 22 | 4  | 11 | 2  | 5.50 | 3.77 | 688 | 22 | 87  | 8  | 0 |
| 3ed_16b_2ea 22  | 11 | 56 | 86 | 22 | 4  | 10 | 2  | 5.62 | 3.83 | 699 | 25 | 86  | 8  | 0 |
| 3ed_16b_11ea21  | 10 | 50 | 81 | 29 | 9  | 10 | 1  | 5.48 | 3.61 | 706 | 26 | 91  | 10 | 0 |
| 3ed_16b_10ea21  | 10 | 50 | 80 | 29 | 10 | 2  | 0  | 5.48 | 3.82 | 710 | 28 | 98  | 10 | 0 |
| 2ed_33b_7ea 26  | 1  | 72 | 98 | 2  | 1  | 0  | 0  | 5.40 | 3.71 | 712 | 28 | 100 | 7  | 0 |
| 2ed_32b_7ea 32  | 3  | 65 | 96 | 3  | 2  | 1  | 0  | 5.27 | 3.77 | 675 | 19 | 98  | 9  | 0 |
| 2ed_26b_10ea10  | 2  | 83 | 81 | 6  | 16 | 0  | 2  | 5.39 | 3.70 | 609 | 2  | 15  | 11 | 0 |
| 2ed_16b_9ea 28  | 6  | 45 | 53 | 26 | 40 | 13 | 2  | 5.15 | 3.27 | 712 | 28 | 100 | 28 | 0 |
| 2ed_16b_7ea 36  | 8  | 49 | 85 | 15 | 6  | 6  | 2  | 5.46 | 3.77 | 702 | 25 | 71  | 13 | 0 |
| 2ed_16b_6ea 34  | 10 | 50 | 83 | 16 | 7  | 7  | 3  | 5.45 | 3.54 | 717 | 29 | 83  | 13 | 0 |
| 2ed_16b_3ea 32  | 13 | 50 | 80 | 18 | 7  | 8  | 3  | 5.58 | 3.84 | 709 | 27 | 94  | 12 | 0 |
| 2ed_16b_2ea 33  | 12 | 50 | 81 | 17 | 6  | 8  | 2  | 5.59 | 3.80 | 712 | 28 | 89  | 12 | 0 |
| 2ed_16b_11ea30  | 6  | 47 | 53 | 23 | 40 | 7  | 1  | 5.49 | 3.63 | 711 | 28 | 81  | 28 | 0 |
| 2ed_16b_10ea30  | 6  | 47 | 53 | 23 | 40 | 2  | 0  | 5.53 | 3.85 | 713 | 28 | 100 | 28 | 0 |
| 23ed_8b_8ea 78  | 20 | 12 | 51 | 5  | 29 | 5  | 17 | 5.47 | 3.76 | 616 | 4  | 0   | 38 | 0 |
| 23ed_8b_4ea 73  | 10 | 16 | 36 | 7  | 53 | 2  | 14 | 5.28 | 3.95 | 636 | 9  | 0   | 48 | 0 |
| 23ed_4b_4ea 82  | 12 | 9  | 50 | 4  | 38 | 1  | 11 | 5.17 | 3.99 | 612 | 3  | 0   | 42 | 0 |
| 23ed_22b_8ea84  | 20 | 8  | 63 | 2  | 15 | 2  | 9  | 5.25 | 3.98 | 601 | 0  | 0   | 31 | 0 |
| 23ed_20b_7ea70  | 19 | 21 | 70 | 5  | 9  | 2  | 3  | 5.26 | 3.87 | 607 | 2  | 0   | 23 | 0 |
| 23ed_20b_10ea70 | 19 | 20 | 64 | 7  | 15 | 0  | 2  | 4.91 | 2.83 | 626 | 6  | 10  | 25 | 0 |
| 23ed_1b_7ea 71  | 19 | 20 | 72 | 5  | 9  | 2  | 3  | 5.00 | 3.21 | 625 | 6  | 2   | 23 | 0 |
|                 |    |    |    |    |    |    |    | 4.98 | 3.05 |     |    |     |    |   |

|                 |    |    |    |    |    |   |   |      |      |     |    |     |    |   |
|-----------------|----|----|----|----|----|---|---|------|------|-----|----|-----|----|---|
| 23ed_1b_10ea72  | 19 | 18 | 67 | 7  | 14 | 0 | 1 | -    | -    | 645 | 11 | 42  | 25 | 0 |
| 23ed_19b_9ea79  | 12 | 10 | 32 | 7  | 54 | 0 | 2 | 5.06 | 3.42 | 668 | 17 | 16  | 47 | 0 |
| 23ed_18b_9ea80  | 11 | 9  | 63 | 7  | 25 | 0 | 0 | 5.08 | 3.27 | 675 | 19 | 97  | 33 | 0 |
| 23ed_16b_7ea63  | 15 | 27 | 79 | 8  | 6  | 3 | 2 | 5.13 | 3.79 | 796 | 49 | 91  | 19 | 0 |
| 23ed_16b_11ea60 | 18 | 26 | 73 | 11 | 9  | 2 | 3 | 4.91 | 3.64 | 796 | 49 | 0   | 20 | 0 |
| 22ed_8b_9ea35   | 5  | 36 | 35 | 26 | 59 | 0 | 3 | 5.08 | 3.99 | 713 | 28 | 9   | 39 | 0 |
| 22ed_33b_7ea37  | 1  | 58 | 98 | 1  | 1  | 0 | 0 | 5.14 | 3.20 | 707 | 27 | 99  | 10 | 0 |
| 22ed_31b_7ea39  | 2  | 55 | 97 | 2  | 1  | 1 | 0 | 5.17 | 3.71 | 707 | 27 | 79  | 11 | 0 |
| 22ed_26b_10ea8  | 1  | 83 | 91 | 7  | 6  | 0 | 0 | 5.14 | 3.58 | 757 | 39 | 31  | 5  | 0 |
| 22ed_16b_9ea33  | 11 | 36 | 73 | 28 | 15 | 6 | 3 | 4.86 | 3.37 | 778 | 44 | 94  | 16 | 0 |
| 22ed_16b_7ea42  | 10 | 41 | 84 | 12 | 6  | 5 | 2 | 5.03 | 3.66 | 760 | 40 | 20  | 14 | 0 |
| 22ed_16b_6ea43  | 11 | 40 | 81 | 12 | 7  | 5 | 3 | 5.00 | 3.30 | 758 | 40 | 96  | 15 | 0 |
| 22ed_16b_11ea40 | 12 | 39 | 79 | 17 | 8  | 3 | 3 | 5.19 | 3.68 | 751 | 38 | 98  | 15 | 0 |
| 22ed_16b_10ea40 | 11 | 39 | 80 | 17 | 8  | 1 | 1 | 5.17 | 3.70 | 753 | 38 | 91  | 14 | 0 |
| 21ed_33b_7ea4   | 1  | 93 | 98 | 3  | 1  | 1 | 0 | 5.13 | 3.64 | 711 | 28 | 98  | 1  | 0 |
| 21ed_32b_7ea8   | 1  | 87 | 97 | 5  | 2  | 2 | 1 | 5.39 | 3.78 | 659 | 15 | 81  | 3  | 0 |
| 21ed_32b_6ea9   | 1  | 86 | 96 | 5  | 3  | 2 | 1 | 5.50 | 3.59 | 655 | 14 | 89  | 4  | 0 |
| 21ed_32b_10ea7  | 2  | 83 | 94 | 9  | 4  | 1 | 0 | 5.64 | 3.82 | 644 | 11 | 88  | 4  | 0 |
| 21ed_31b_7ea8   | 1  | 87 | 97 | 5  | 2  | 2 | 0 | 5.61 | 3.83 | 704 | 26 | 80  | 3  | 0 |
| 21ed_31b_6ea8   | 1  | 87 | 96 | 5  | 2  | 2 | 1 | 5.35 | 3.58 | 699 | 25 | 93  | 4  | 0 |
| 21ed_31b_5ea7   | 2  | 81 | 94 | 12 | 4  | 6 | 2 | 5.49 | 3.81 | 714 | 29 | 84  | 4  | 0 |
| 21ed_16b_6ea19  | 11 | 61 | 81 | 20 | 8  | 9 | 3 | 5.40 | 3.84 | 615 | 4  | 82  | 9  | 0 |
| 21ed_16b_11ea7  | 10 | 56 | 74 | 26 | 17 | 6 | 3 | 5.74 | 3.59 | 615 | 4  | 89  | 13 | 0 |
| 21ed_16b_10ea6  | 9  | 55 | 73 | 28 | 18 | 2 | 1 | 5.67 | 3.63 | 618 | 4  | 74  | 13 | 0 |
| 20ed_34b_7ea25  | 1  | 70 | 98 | 2  | 1  | 1 | 0 | 5.62 | 3.56 | 687 | 22 | 82  | 7  | 0 |
| 20ed_33b_7ea26  | 1  | 69 | 98 | 2  | 1  | 1 | 0 | 5.32 | 3.84 | 711 | 28 | 100 | 7  | 0 |
| 20ed_32b_7ea35  | 2  | 58 | 96 | 3  | 2  | 1 | 1 | 5.29 | 3.75 | 658 | 14 | 93  | 10 | 0 |
| 20ed_31b_7ea29  | 2  | 63 | 97 | 3  | 2  | 1 | 0 | 5.41 | 3.65 | 707 | 27 | 91  | 8  | 0 |
| 20ed_16b_7ea37  | 8  | 44 | 86 | 14 | 6  | 6 | 2 | 5.27 | 3.64 | 732 | 33 | 42  | 13 | 0 |
| 20ed_16b_6ea38  | 9  | 43 | 83 | 15 | 7  | 7 | 3 | 5.15 | 3.42 | 731 | 33 | 95  | 14 | 0 |
| 20ed_16b_11ea5  | 10 | 41 | 81 | 20 | 9  | 4 | 3 | 5.36 | 3.80 | 722 | 30 | 92  | 14 | 0 |
| 20ed_16b_10ea4  | 9  | 40 | 82 | 21 | 8  | 1 | 1 | 5.32 | 3.81 | 727 | 32 | 100 | 13 | 0 |
| 1ed_33b_7ea38   | 1  | 60 | 98 | 2  | 1  | 1 | 0 | 5.28 | 3.75 | 708 | 27 | 81  | 10 | 0 |
| 1ed_32b_7ea57   | 2  | 41 | 96 | 2  | 2  | 1 | 1 | 5.37 | 3.85 | 629 | 7  | 100 | 15 | 0 |
| 1ed_31b_7ea46   | 2  | 51 | 96 | 3  | 2  | 1 | 0 | 5.51 | 3.76 | 697 | 24 | 98  | 12 | 0 |
| 1ed_26b_10ea3   | 1  | 89 | 80 | 7  | 18 | 0 | 2 | 5.37 | 3.78 | 607 | 2  | 8   | 10 | 0 |
| 1ed_18b_9ea82   | 6  | 9  | 61 | 8  | 33 | 0 | 2 | 5.12 | 3.18 | 674 | 19 | 88  | 37 | 0 |
| 1ed_16b_7ea53   | 9  | 35 | 85 | 11 | 6  | 5 | 2 | 5.62 | 3.83 | 710 | 27 | 95  | 17 | 0 |
| 19ed_32b_7ea9   | 2  | 86 | 96 | 5  | 2  | 2 | 1 | 5.29 | 3.67 | 657 | 14 | 90  | 3  | 0 |
| 19ed_31b_7ea8   | 2  | 87 | 97 | 5  | 2  | 2 | 0 | 5.64 | 3.82 | 701 | 25 | 93  | 3  | 0 |
| 19ed_16b_7ea25  | 7  | 56 | 86 | 19 | 6  | 8 | 3 | 5.48 | 3.81 | 680 | 20 | 100 | 10 | 0 |
| 17ed_32b_7ea22  | 2  | 74 | 96 | 4  | 2  | 1 | 1 | 5.58 | 3.76 | 656 | 14 | 88  | 7  | 0 |
| 17ed_31b_7ea17  | 2  | 79 | 96 | 5  | 2  | 1 | 0 | 5.60 | 3.83 | 702 | 25 | 91  | 5  | 0 |
| 17ed_16b_7ea42  | 9  | 44 | 85 | 14 | 7  | 6 | 3 | 5.45 | 3.82 | 687 | 22 | 98  | 14 | 0 |
| 16ed_34b_7ea31  | 2  | 67 | 97 | 2  | 1  | 1 | 0 | 5.48 | 3.78 | 699 | 25 | 84  | 8  | 0 |
| 16ed_33b_7ea36  | 1  | 63 | 98 | 1  | 1  | 0 | 0 | 5.26 | 3.84 | 718 | 30 | 99  | 9  | 0 |
| 16ed_32b_7ea41  | 3  | 56 | 95 | 2  | 2  | 1 | 0 | 5.23 | 3.77 | 676 | 19 | 96  | 11 | 0 |
| 16ed_31b_7ea36  | 3  | 61 | 96 | 3  | 1  | 1 | 0 | 5.34 | 3.68 | 726 | 32 | 94  | 10 | 0 |
| 16ed_18b_9ea48  | 7  | 18 | 54 | 34 | 38 | 0 | 1 | 5.21 | 3.66 | 680 | 20 | 99  | 31 | 0 |
| 16ed_16b_9ea31  | 7  | 37 | 50 | 31 | 44 | 9 | 2 | 5.57 | 3.71 | 744 | 36 | 100 | 30 | 0 |
| 16ed_16b_7ea47  | 9  | 41 | 85 | 12 | 6  | 5 | 2 | 5.28 | 3.76 | 713 | 28 | 64  | 15 | 0 |
| 16ed_16b_6ea43  | 11 | 44 | 82 | 13 | 7  | 6 | 3 | 5.35 | 3.51 | 723 | 31 | 97  | 15 | 0 |
| 16ed_16b_2ea39  | 13 | 45 | 80 | 16 | 6  | 8 | 3 | 5.50 | 3.79 | 719 | 30 | 98  | 14 | 0 |
|                 |    |    |    |    |    |   |   | 5.49 | 3.70 |     |    |     |    |   |

|                |    |    |    |    |    |   |   |      |      |     |    |     |    |   |
|----------------|----|----|----|----|----|---|---|------|------|-----|----|-----|----|---|
| 16ed_16b_11e37 | 7  | 43 | 52 | 20 | 41 | 4 | 1 | -    | -    | 723 | 31 | 100 | 30 | 0 |
| 16ed_16b_10e36 | 7  | 42 | 53 | 21 | 41 | 1 | 0 | 5.42 | 3.74 | 723 | 31 | 99  | 30 | 0 |
| 14ed_32b_7ea94 | 2  | 1  | 96 | 0  | 2  | 0 | 1 | 5.40 | 3.71 | 622 | 5  | 100 | 24 | 0 |
| 14ed_31b_7ea93 | 2  | 1  | 97 | 0  | 2  | 0 | 0 | 5.42 | 3.73 | 686 | 22 | 99  | 24 | 0 |
| 14ed_16b_7ea91 | 7  | 2  | 86 | 1  | 6  | 0 | 3 | 5.39 | 3.72 | 653 | 13 | 85  | 27 | 0 |
| 13ed_31b_7ea55 | 3  | 43 | 95 | 2  | 2  | 1 | 0 | 5.39 | 3.61 | 705 | 26 | 84  | 15 | 0 |
| 13ed_20b_1ea77 | 12 | 19 | 74 | 4  | 8  | 0 | 1 | 5.32 | 3.84 | 611 | 3  | 81  | 23 | 0 |
| 13ed_1b_9ea 6  | 12 | 11 | 26 | 81 | 58 | 0 | 0 | 5.44 | 3.85 | 625 | 6  | 90  | 31 | 0 |
| 13ed_1b_10ea71 | 17 | 20 | 70 | 9  | 13 | 1 | 1 | 5.34 | 3.64 | 600 | 0  | 84  | 24 | 0 |
| 13ed_16b_7ea59 | 13 | 31 | 81 | 10 | 6  | 4 | 3 | 5.42 | 3.60 | 747 | 37 | 87  | 18 | 0 |
| 11ed_26b_10e4  | 2  | 88 | 81 | 7  | 17 | 0 | 2 | 5.24 | 3.83 | 608 | 2  | 13  | 10 | 0 |
| 11ed_1b_7ea 72 | 18 | 20 | 74 | 6  | 8  | 2 | 3 | 5.17 | 3.24 | 604 | 1  | 12  | 23 | 0 |
| 11ed_1b_10ea72 | 19 | 18 | 68 | 8  | 12 | 1 | 1 | 5.21 | 3.23 | 622 | 6  | 84  | 25 | 0 |
| 10ed_33b_2ea37 | 1  | 59 | 97 | 1  | 2  | 1 | 1 | 5.29 | 3.60 | 712 | 28 | 85  | 10 | 0 |
| 10ed_32b_7ea44 | 2  | 50 | 96 | 2  | 2  | 1 | 1 | 5.30 | 3.84 | 656 | 14 | 91  | 12 | 0 |
| 10ed_32b_2ea48 | 2  | 47 | 93 | 2  | 4  | 1 | 2 | 5.38 | 3.64 | 657 | 14 | 89  | 14 | 0 |
| 10ed_31b_7ea37 | 2  | 57 | 96 | 3  | 2  | 1 | 0 | 5.44 | 3.82 | 704 | 26 | 89  | 10 | 0 |
| 10ed_31b_2ea41 | 2  | 53 | 94 | 3  | 4  | 1 | 2 | 5.25 | 3.63 | 707 | 27 | 94  | 12 | 0 |
| 10ed_26b_10e5  | 1  | 86 | 80 | 8  | 18 | 1 | 2 | 5.30 | 3.80 | 608 | 2  | 4   | 11 | 0 |
| 10ed_16b_7ea43 | 9  | 41 | 85 | 13 | 5  | 5 | 2 | 5.06 | 3.10 | 737 | 34 | 40  | 14 | 0 |
| 10ed_16b_6ea44 | 10 | 39 | 82 | 13 | 7  | 6 | 3 | 5.13 | 3.41 | 740 | 35 | 97  | 15 | 0 |
| 10ed_16b_11e41 | 11 | 38 | 81 | 18 | 7  | 6 | 3 | 5.32 | 3.79 | 733 | 33 | 82  | 15 | 0 |
| 10ed_16b_10e40 | 11 | 38 | 81 | 19 | 8  | 1 | 1 | 5.32 | 3.84 | 734 | 33 | 100 | 14 | 0 |
|                |    |    |    |    |    |   |   | 5.25 | 3.74 |     |    |     |    |   |

Figure S6: A molecular orbital diagram (MO) of the LSF calculated HOMO and LUMO orbital energy for the 7,906 theoretical dyes that include the iodide/triiodide redox shuttle (red dashed line) and TiO<sub>2</sub> semiconductor conduction bands (blue dashed line) energy levels. The theoretical dyes are separated into three groups based off of their LSF  $\lambda_{max}$ . A) 800-1000 nm B) 600-800 nm C) 400-600 nm

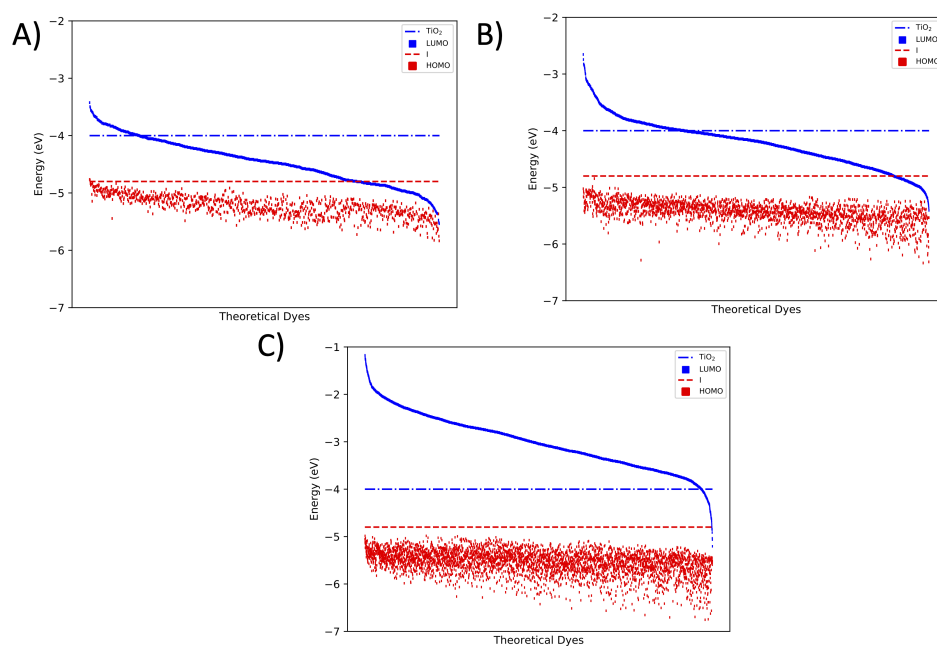

# 1 Experimental Supplementary Information

## 1.1 General Information

All reagents were either synthesized as previously described (see main text for reference) or purchased from commercial sources and used without further purification. Thin layer chromatography was conducted using Sorbtech glass backed 250 $\mu$ m Silica Gel XHL TLC plates and visualized under a UV lamp. Preparative chromatography was performed using a CombiFlash Rf + system equipped with silica gel cartridges purchased from Luknova SuperSep (particle size 50 $\mu$ m). NMR spectra were recorded on a Bruker Avance-400 (400MHz) spectrometer. Chemical shifts are reported in ppm using the specified NMR solvent residual protonation peak as an internal standard (CDCl<sub>3</sub> at 7.26 ppm, DMSO-d<sub>6</sub> at 2.50 ppm). Peaks are reported as: s = singlet, d = doublet, t = triplet, q = quartet, p = pentet, sept = septet, m = multiplet, and br = broad. Coupling constants are expressed for the <sup>1</sup>H-NMR spectra in Hertz (Hz). Absorbance spectra were measured using an Avantes/AvaSpecULS2048-USB2-50 spectrometer (Pine Research part RRAVSP3) with an Avantes/AvaSpec light source (Pine Research part RRAVSP) and AvaSoft8 software program. Cyclic voltammetry measurements were recorded using a C-H Instruments Electrochemical Analyzer (CHI-600E) and were taken using a platinum counter electrode, an Ag/AgCl reference electrode, and a glassy carbon working electrode in DCM with a 0.1 M Bu<sub>4</sub>NPF<sub>6</sub> electrolyte. Ferrocene was used as a reference at 0.70 V versus the normal hydrogen electrode (NHE) in DCM. HRMS spectra were obtained with a QTOF HRMS utilizing nanospray ionization with the mass analyzer set to the 200-2000 Da range. FT-IR experiments were recorded on a Bruker Alpha FT-IR spectrometer.

## 1.2 Device Fabrication

Fluorine doped tin oxide (FTO) coated glass was purchased from Hartford Glass. TEC 10 glass was used for the photoanodes and TEC 7 glass was used for the counter electrodes. P18 TiO<sub>2</sub> (particle size 18 nm, 18NR-T) and P30 TiO<sub>2</sub> (particle size 30 nm, 30NR-D) was purchased from Greatcell Solar and was used for the active layer (P18 used with iodine electrolyte, P30 used with cobalt electrolyte) and the scattering layer TiO<sub>2</sub> was purchase from Solaronix (particle size 100 nm, R/SP). Surlyn was purchased from Solaronix (25  $\mu$  m thick, Meltonix 1170). Device fabrication including glass cleaning, TiO<sub>2</sub> printing and sintering, preparation of the platinum counter electrodes, and Surlyn sealing was conducted in a manner previously described<sup>[95]</sup>. The photoanode was sensitized by submerging the TiO<sub>2</sub><sup>-</sup> film into a dye solution containing 0.3 mM **WM3** and 6 mM CDCA in 4:1 EtOH:THF for 16 hours. After the dipping period, the photoanodes were rinsed gently with MeCN and dried under N<sub>2</sub>flow for approximately 30 seconds before sealing with a Surlyn ring to the platinum counter electrode. Electrolyte was then added into one of the two holes of the counter electrode until the device was filled and electrolyte



Figure S7: Structure of AP25 and  $\text{Co(dOMe-bpy)}_3^{3+/2+}$  mentioned and/or utilized in this study.

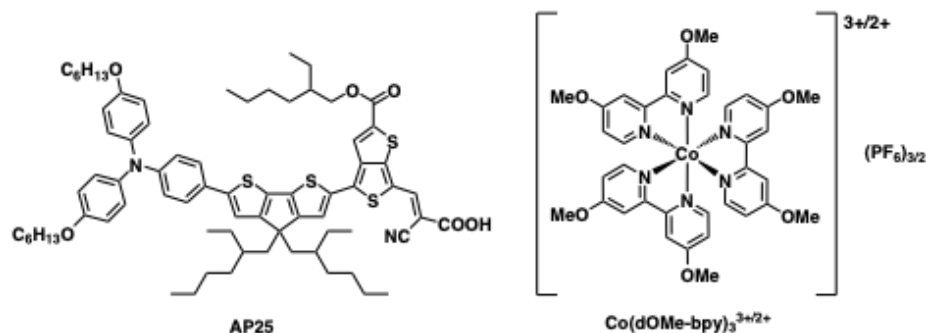

began to exit the second hole in the counter electrode. The iodine electrolyte consisted of 0.1 M guanidinium thiocyanate, 1.0 M 1,3-Dimethylimidazolium iodide, 0.03 M iodine, 0.5 M 4-tert-Butylpyridine, and 0.1 M lithium iodide in 85:15 acetonitrile:valeonitrile. The cobalt electrolyte consisted of 0.25 M  $\text{Co(dOMe-bpy)}_3(\text{PF}_6)_2$ , 0.05 M  $\text{Co(dOMe-bpy)}_3(\text{PF}_6)_3$ , 0.25 M 4-tert-Butylpyridine, and 0.1 M LiTFSI in acetonitrile. Once the electrolyte was added, the devices were sealed with a Surlyn ring and glass cover slip and subjected to further measurements.

### 1.3 Device measurements

Photovoltaic characteristics were measured using a 300 W xenon lamp (Model SF300A, SCIENCETECH Inc. Class AAA) solar simulator equipped with an AM 1.5 G filter for a less than 2% spectral mismatch. Prior to each measurement, the solar simulator output was calibrated with a KG5 filtered mono-crystalline silicon NREL calibrated reference cell from ABET Technologies (Model 15150-KG5). The current density-voltage characteristic of each cell was obtained with Keithley digital source meter (Model 2400). Electrochemical impedance spectrometry was carried out using a C-H Instruments Electrochemical Analyzer (CHI-600E) under full sun irradiation. Current dynamics measurements were collected using a C-H Instruments Electrochemical Analyzer (CHI-600E) using irradiation from the solar simulator equipped with a shutter and filter wheel. The incident photon-to-current conversion efficiency was measured with an IPCE instrument manufactured by Dyenamo (DN-AE03) comprised of a 175 W xenon lamp (CERMAX, Model LX175F), monochromator (Spectral Products, Model CM110, CzernyTurner, dual-grating), filter wheel (Spectral Products, Model AB301T, fitted with filter AB3044 [440 nm high pass] and filter AB3051 [510 nm high pass]), a calibrated UV-enhanced silicon photodiode reference and Dyenamo issued software. Small modulation photovoltage transient (SMPVT) measurements were carried out with the Dyenamo toolbox (DN-AE01).

Figure S8: Cyclic voltammogram of **WM3** in DCM solution with a 0.1 M TBAPF<sub>6</sub> electrolyte referenced using Fc<sup>+</sup>/Fc at 0.70 V vs NHE in DCM

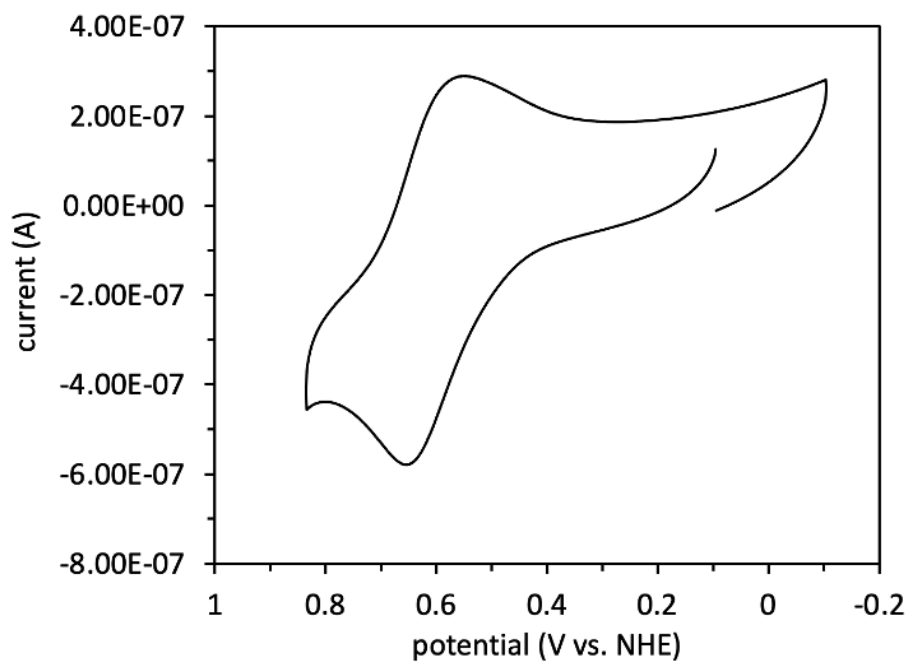

Figure S9: Current Dynamics plot of **WM3** devices with the iodine electrolyte (left) cobalt electrolyte (right).

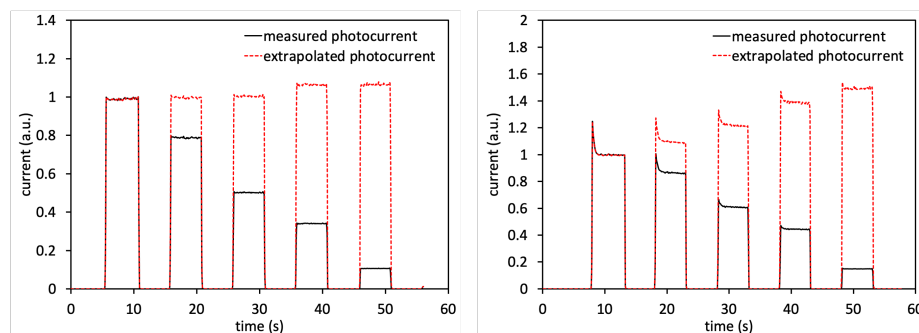

#### 1.4 Additionally Supplementary graphs/figures/discussion

Current dynamics plots demonstrate the amount of current generated over time at different sun intensities while the light source is shuttered on and off. The measured photocurrent is the data taken directly from the experiment, and the extrapolated photocurrent is the measured photocurrent divided by the sun intensity at each time point (1.0, 0.79, 0.50, 0.32, and 0.10 sun used herein). Iodine based devices generate an amount of photocurrent proportional to the irradiation intensity under both full sun and low light conditions demonstrated by the extrapolated photocurrent being very similar across each of the sun intensities (Figure S9, left). Further, iodine-based devices demonstrate a consistent, flat lined current production when the light is shuttered on, indicating satisfactory mass transport of the redox shuttle through the electrolyte medium to regenerate the dye. On the other hand, cobalt based devices demonstrate a photocurrent extrapolated response that is inversely proportional to the irradiation intensity (Figure S9, right). This can be seen in the extrapolated photocurrent which gradually increases as the photon flux decreases. Further, when the light is shuttered on in the cobalt devices a spike in photocurrent is observed that quickly levels off and flatlines to a consistent value. This spike indicates that there is a problem associated with mass transport of the redox shuttle through the mesoporous  $\text{TiO}_2$ , where under high photon flux conditions the redox shuttle cannot diffuse fast enough through the solution to efficiently regenerate the dye. The magnitude of this spike is observed to decrease as the photon flux decreases, indicating that as the photocurrent decreases the redox shuttle can adequately diffuse through solution to effectively regenerate the dye.

Figure S10: SMPVT plot of **WM3** devices.

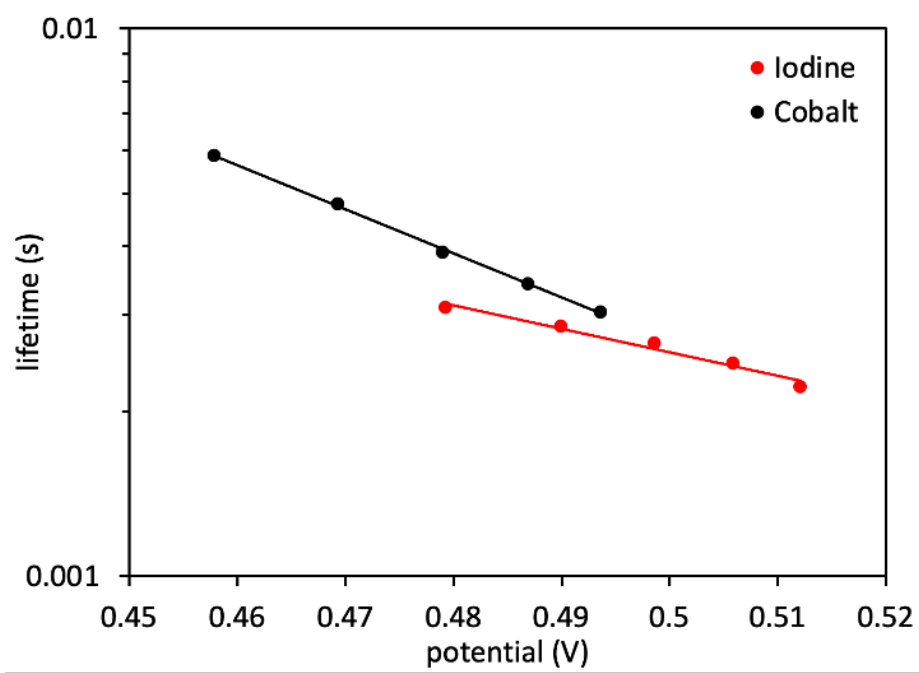

Figure S11: Nyquist plot of **WM3** devices.

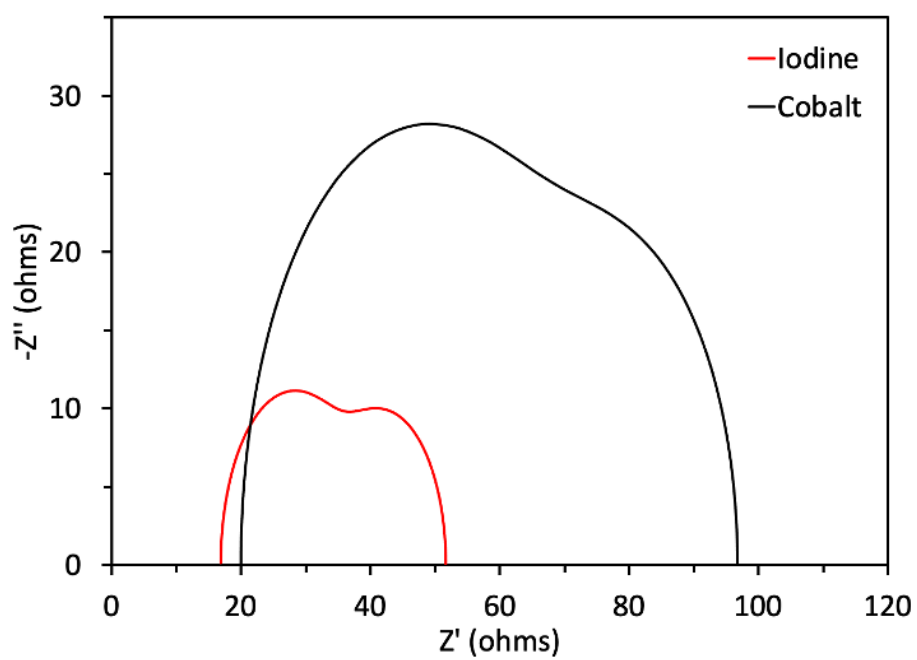

Figure S12: Bode plot of **WM3** devices

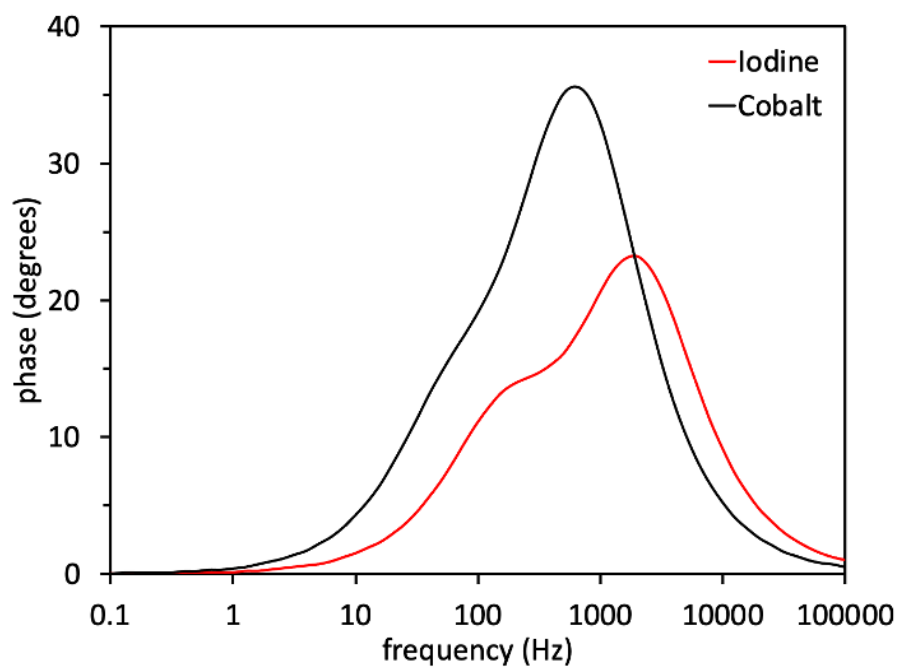

Small modulated photovoltage transient (SMPVT) measurements were conducted for **WM3** devices to observe the lifetime of electrons in TiO<sub>2</sub> (Figure S10). Cobalt-based devices demonstrate slightly better lifetimes than iodine-based devices, however, the two are quite close in magnitude and demonstrate no significant difference in the lifetime of electrons in TiO<sub>2</sub>. This finding is somewhat surprising given that iodine is notorious for longer electron lifetimes in TiO<sub>2</sub> given its coulombically repulsive negative charge that discourages recombination.

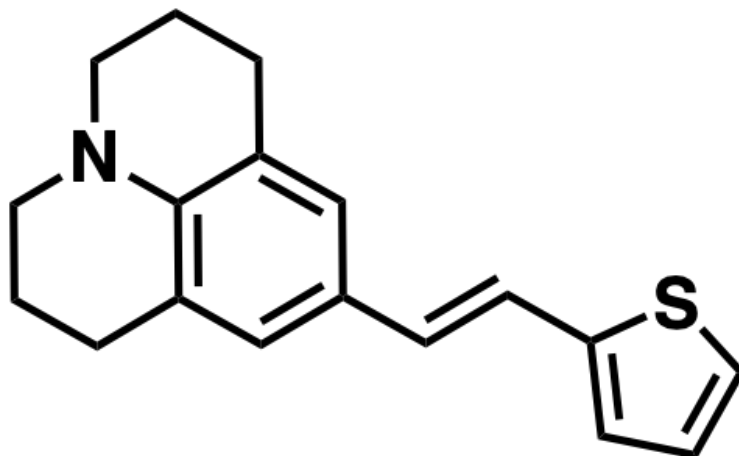

(*E*)-9-(2-(thiophen-2-yl)vinyl)-2,3,6,7-tetrahydro-1H,5H-pyrido[3,2,1-*ij*]quinoline (**3**): To a flame dried round bottom flask under N<sub>2</sub> was added 2,3,6,7-tetrahydro-1H,5H-pyrido[3,2,1-*ij*]quinoline-9-carbaldehyde (**1**, 0.304 g, 1.51 mmol) and diethyl (thiophen-2-ylmethyl)phosphonate (**2**, 0.30 mL, 1.51 mmol) in dioxane (15.1 mL, 0.1 M). KHMDs (7.6 mL, 3.8 mmol) was added dropwise to the reaction at room temperature over 10 minutes and the reaction was allowed to stir for 3 hours at room temperature. After this period there was no starting material observed via NMR. The reaction was quenched with H<sub>2</sub>O and extracted with DCM/H<sub>2</sub>O, the organics dried over Na<sub>2</sub>SO<sub>4</sub>, and concentrated to dryness to yield the crude product. The crude product was purified via silica gel chromatography using 25% DCM/Hx as an eluent to elute the pure product as a fluorescent yellow oil (0.385 g, 1.37 mmol, 91%). <sup>1</sup>H NMR (400 MHz, CDCl<sub>3</sub>, Figure S11) δ 7.08 (d, *J* = 4.7 Hz, 1H), 6.99 - 6.95 (s, 3H), 6.93 (s, 2H), 6.77 (d, *J* = 16.0, 1H), 3.17 (t, *J* = 5.4 Hz, 4H), 2.76 (t, *J* = 6.4 Hz, 4H), 1.98 (t, *J* = 5.2 Hz, 4H) ppm. <sup>13</sup>C <sup>1</sup>H NMR (100 MHz, CDCl<sub>3</sub>, Figure S12) δ 144.4, 142.7, 129.2, 127.5, 125.4, 124.3, 122.8, 121.6, 121.6, 117.0, 50.2, 27.8, 22.1. HRMS *m/z* calculated for C<sub>18</sub>H<sub>19</sub>NS [M]<sup>+</sup> 281.1238, found 281.1268. IR (drop cast from DCM, cm<sup>-1</sup>) 3101, 3065, 3016, 2926, 2883, 2835, 2786, 1655, 1601, 1518, 1499, 1463, 1430, 1356, 1330, 1308, 1289, 1263, 1205, 1183, 1158, 1122, 1073, 1050.

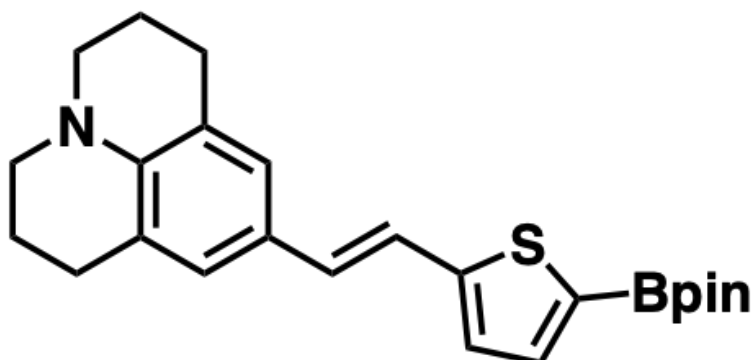

(*E*)-9-(2-(5-(4,4,5,5-tetramethyl-1,3,2-dioxaborolan-2-yl)thiophen-2-yl)vinyl)-2,3,6,7-tetrahydro-1*H*,5*H*-pyrido[3,2,1-*ij*]quinoline (**4**): To a flame dried round bottom flask under N<sub>2</sub> was added (*E*)-9-(2-(thiophen-2-yl)vinyl)-2,3,6,7-tetrahydro-1*H*,5*H*-pyrido[3,2,1-*ij*]quinoline (**3**, 0.370 g, 1.32 mmol) and THF (6.6 mL, 0.2 M). The reaction was cooled to -78°C and *n*-BuLi (0.60 mL, 1.45 mmol) was added dropwise. The reaction was allowed to stir at -78°C for 1 hour before isopropyl pinacol borate (0.54 mL, 2.63 mmol) was added dropwise to the reaction and the reaction removed from the cold bath and allowed to come to room temperature. After 3 hours at room temperature the reaction was observed to be complete via <sup>1</sup>H-NMR and was quenched via H<sub>2</sub>O and extracted with EtOAc/H<sub>2</sub>O 3x, the organics dried over Na<sub>2</sub>SO<sub>4</sub>, and concentrated to dryness to yield the crude product. The crude material was subjected to silica gel chromatography using 50% DCM/Hx to yield the product as a fluorescent yellow oil (0.174 g, 0.426 mmol, 32%) \*Note that the reaction yield from the NMR appeared to be much higher (appeared quantitative) than the isolated yield and that the product was observed to be unstable on silica gel leading to the low yield. <sup>1</sup>H NMR (400 MHz, CDCl<sub>3</sub>, Figure S14) δ 7.50 (d, *J* = 3.5 Hz, 1H), 7.02 - 6.97 (m, 2H), 6.93 (s, 2H), 6.87 (d, *J* = 16.0 Hz, 1H), 3.18 (t, *J* = 5.6 Hz, 4H), 2.76 (t, *J* = 6.4 Hz, 4H), 1.97 (pent, *J* = 6.0 Hz, 4H), 1.35 (s, 12H). <sup>13</sup>C <sup>1</sup>H NMR (100 MHz, CDCl<sub>3</sub>, Figure S15) δ 151.3, 143.1, 137.9, 130.8, 125.6, 125.5, 124.2, 121.5, 116.5, 84.1, 50.1, 27.8, 24.9, 22.1. HRMS *m/z* calculated for C<sub>24</sub>H<sub>30</sub>BNO<sub>2</sub>S [M]<sup>+</sup> 407.2205, found 407.2210. IR (dropcase from DCM, cm<sup>-1</sup>) 3060, 3016, 2976, 2930, 2886, 2837, 2789, 1599, 1502, 1454, 1379, 1358, 1336, 1307, 1267, 1207, 1183, 1158, 1139, 1062, 1012.



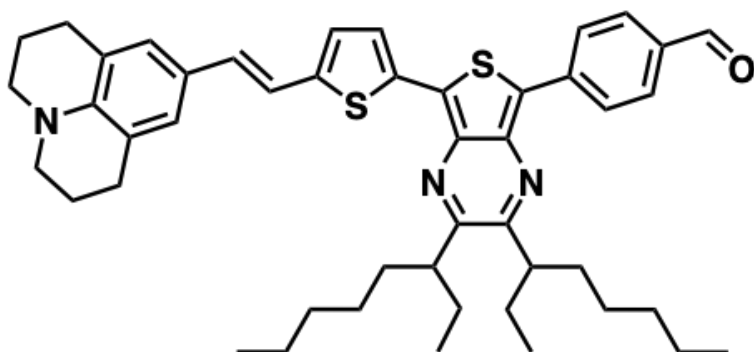

(*E*)-4-(2,3-di(octan-3-yl)-7-(5-(2-(2,3,6,7-tetrahydro-1*H*, 5*H*-pyrido[3,2,1-*ij*]quinolin-9-yl)vinyl)thiophen-2-yl)thieno[3,4-*b*]pyrazin-5-yl)benzaldehyde (**7**): To a pressure flask under N<sub>2</sub> was added (*E*)-9-(2-(5-(4,4,5,5-tetramethyl-1,3,2-dioxaborolan-2-yl)thiophen-2-yl)vinyl)-2,3,6,7-tetrahydro-1*H*,5*H*-pyrido[3,2,1-*ij*]quinoline (**4**, 63 mg, 0.117 mmol), 4-(4,4,5,5-tetramethyl-1,3,2-dioxaborolan-2-yl)benzaldehyde (**5**, 27 mg, 0.117 mmol), 5,7-dibromo-2,3-bis(2-ethylhexyl)thieno[3,4-*b*]pyrazine (**6**, 55 mg, 0.106 mmol), THF (2.1 mL, 0.05M), and 2.0 M K<sub>2</sub>CO<sub>3</sub>(aq) (0.53 mL, 0.2M). The reaction was degassed with N<sub>2</sub> for 15 minutes before adding Pd(PPh<sub>3</sub>)<sub>4</sub> (6.0 mg, 0.0053 mmol), then degassed with N<sub>2</sub> for another for another 5 minutes, and then sealed and heated to 90°C for 4 hours. After 4 hours there was no starting material remaining via TLC so the reaction was cooled to room temperature and extracted with DCM/H<sub>2</sub>O 3x, the organics collected and dried over Na<sub>2</sub>SO<sub>4</sub>, and concentrated to dryness to yield the crude product. The product was purified via silica gel chromatography starting with 20% DCM/Hx and gradually increasing to 100% DCM to yield the pure product as a dark blue solid (8.1 mg, 0.011 mmol, 10%). <sup>1</sup>H NMR (400 MHz, CDCl<sub>3</sub>, Figure S16) δ 10.01 (s, 1H), 8.45 (d, *J* = 8.2 Hz, 2H), 7.91 (d, *J* = 8.4 Hz, 2H), 7.62 (d, *J* = 3.8 Hz, 1H), 7.00 - 6.85 (m, 5H), 3.19 (br s, 4H), 2.88 (m, 4H), 2.77 (br s, 4H), 2.30 (sept, *J* = 6.1 Hz, 1H), 2.18 (sept, *J* = 6.1 Hz, 1H), 1.99 (pent, *J* = 5.9 Hz, 4H), 1.59 - 1.23 (m, 16H), 0.99 (q, *J* = 7.9 Hz, 6H), 0.91 (q, *J* = 6.8 Hz, 6H) ppm. <sup>13</sup>C NMR (100 MHz, CDCl<sub>3</sub>, Figure S17) δ 191.6, 157.4, 155.8, 146.4, 143.1, 140.2, 140.0, 138.5, 134.5, 132.1, 130.3, 130.0, 129.0, 127.2, 126.1, 125.6, 125.2, 125.0, 124.5, 121.6, 116.8, 50.2, 39.7, 39.5, 37.9, 37.7, 33.1, 29.2, 27.9, 26.2, 26.1, 23.3, 22.1, 14.3, 14.3, 11.1 ppm. HRMS *m/z* calculated for C<sub>47</sub>H<sub>57</sub>N<sub>3</sub>OS<sub>2</sub> [M]<sup>+</sup> 743.3943, found 743.3922. IR (dispersed in DCM, cm<sup>-1</sup>) 3058, 3015, 2954, 2925, 2855, 2730, 1693, 1595, 1558, 1506, 1464, 1446, 1378, 1352, 1337, 1310, 1280, 1214, 1183, 1160, 1074, 1053, 1014.

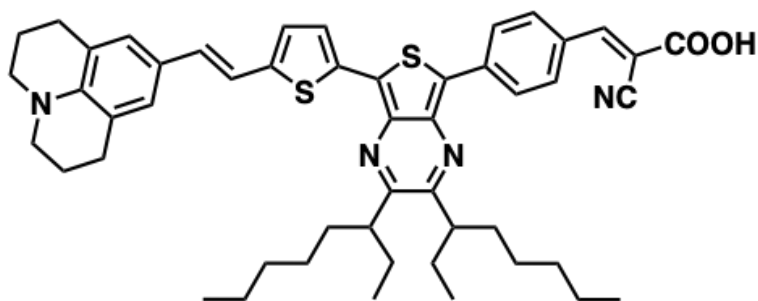

(*E*)-2-cyano-3-(4-(2,3-di(octan-3-yl)-7-(5-((*E*)-2-(2,3,6,7-tetrahydro-1*H*,5*H*-pyrido[3,2,1-*ij*]quinolin-9-yl)vinyl)thiophen-2-yl)thieno[3,4-*b*]pyrazin-5-yl)phenyl)acrylic acid: To a flame dried pressure flask under N<sub>2</sub> was added (*E*)-4-(2,3-di(octan-3-yl)-7-(5-(2-(2,3,6,7-tetrahydro-1*H*,5*H*-pyrido[3,2,1-*ij*]quinolin-9-yl)vinyl)thiophen-2-yl)thieno[3,4-*b*]pyrazin-5-yl)benzaldehyde (7, 8.1 mg, 0.011 mmol), cyanoacetic acid (2.7 mg, 0.032 mmol), piperidine (7.6 μL, 0.077 mmol), and CHCl<sub>3</sub> (0.2 mL, 0.05M). The reaction was sealed and heated to 95°C for 45 minutes. At this time minimal starting material was observed to be remaining via TLC so the reaction was cooled to room temperature and extracted using DCM/H<sub>2</sub>O (with 1% AcOH) 3x, the organics were collected concentrated to dryness. The crude product was then columned using 100% DCM and gradually increasing to 30% MeOH/DCM to yield the pure product as a dark green solid (8.1 mg, 0.010 mmol, 91%). <sup>1</sup>H NMR (400 MHz, DMSO-*d*<sub>6</sub>, Figure S18) δ 8.34 (d, *J* = 8.3 Hz, 2H), 7.96 (d, *J* = 8.2 Hz, 2H), 7.91 (s, 1H), 7.63 (d, *J* = 3.9 Hz, 1H), 7.13 - 7.09 (m, 2H), 6.93 (s, 2H), 6.76 (d, *J* = 16.0 Hz, 1H), 3.16 (m, 4H), 2.89 (m, 4H), 2.69 (m, 4H), 1.88 (p, *J* = 5.8 Hz, 4H), 1.52 - 1.23 (m, 18H), 0.95 (q, *J* = 7.9 Hz, 6H), 0.86 (q, *J* = 6.6 Hz, 6H). HRMS *m/z* calculated for C<sub>50</sub>H<sub>57</sub>N<sub>4</sub>O<sub>2</sub>S<sub>2</sub> [M]<sup>+</sup> 810.4001, found 810.4020. IR (dropcast from DCM, cm<sup>-1</sup>) 3351 (br), 2954, 2918, 2850, 2213, 1621, 1593, 1543, 1507, 1464, 1446, 1417, 1377, 1347, 1311, 1281, 1260, 1206, 1191, 1159, 1096, 1052, 1026.

Figure S13:  $^1\text{H}$  NMR (400 MHz,  $\text{CDCl}_3$ ) of 3

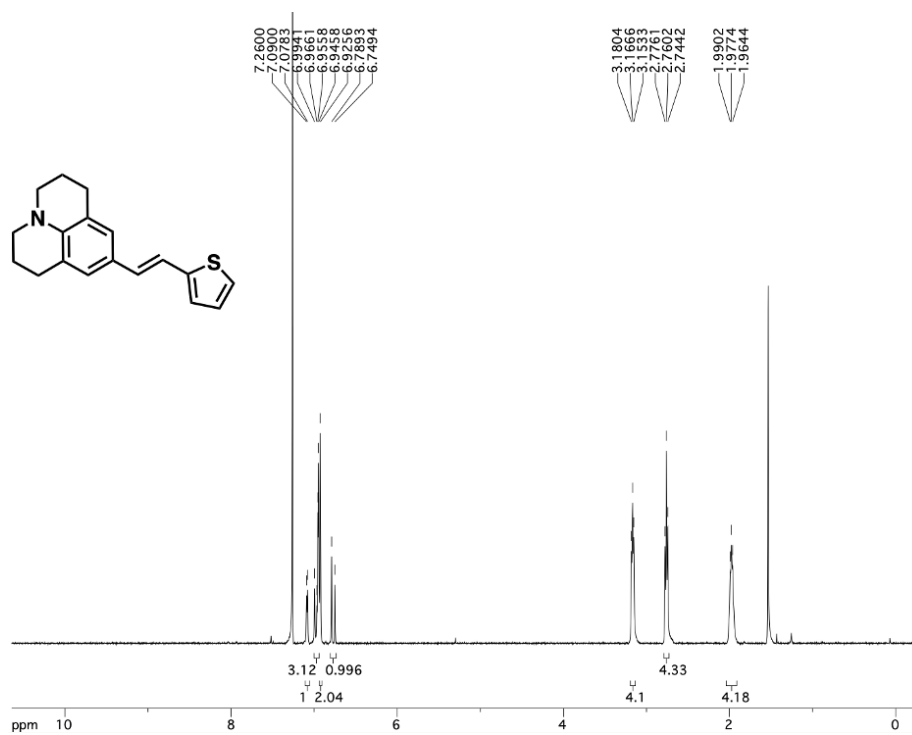

Figure S14:  $^{13}\text{C}^1\text{H}$  (100 MHz,  $\text{CDCl}_3$ ) of 3.

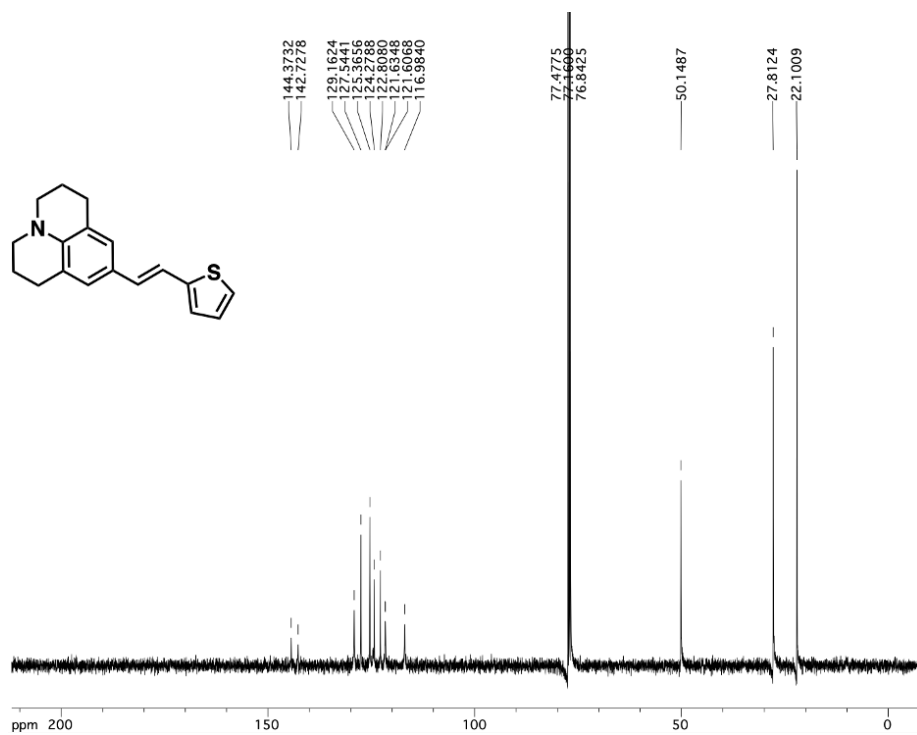

Figure S15:  $^1\text{H}$  NMR (400 MHz,  $\text{CDCl}_3$ ) of 4

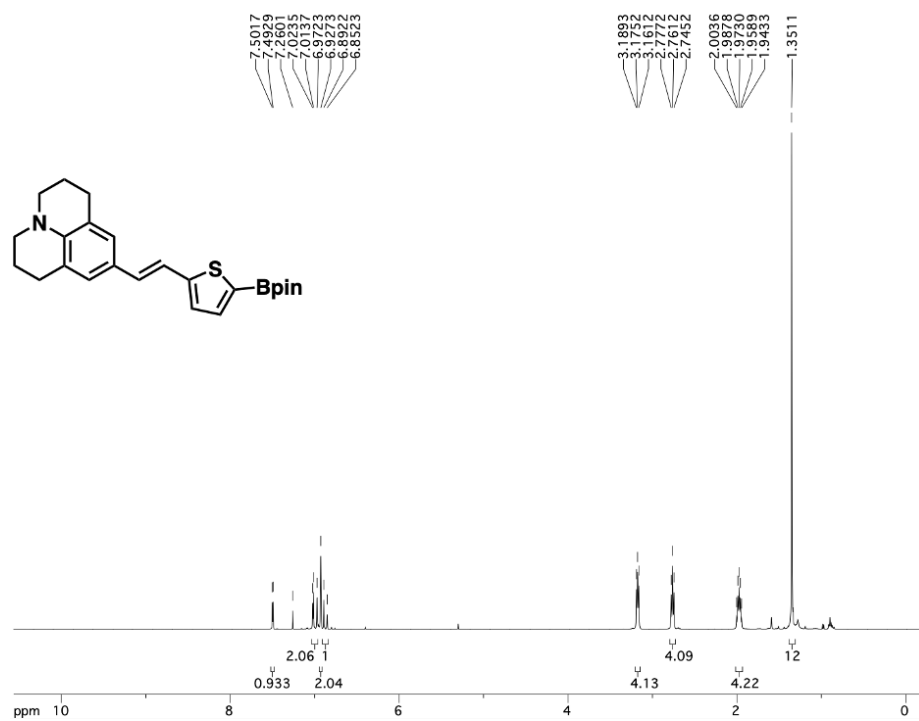

Figure S16:  $^{13}\text{C}^1\text{H}$  (100 MHz,  $\text{CDCl}_3$ ) of 4.

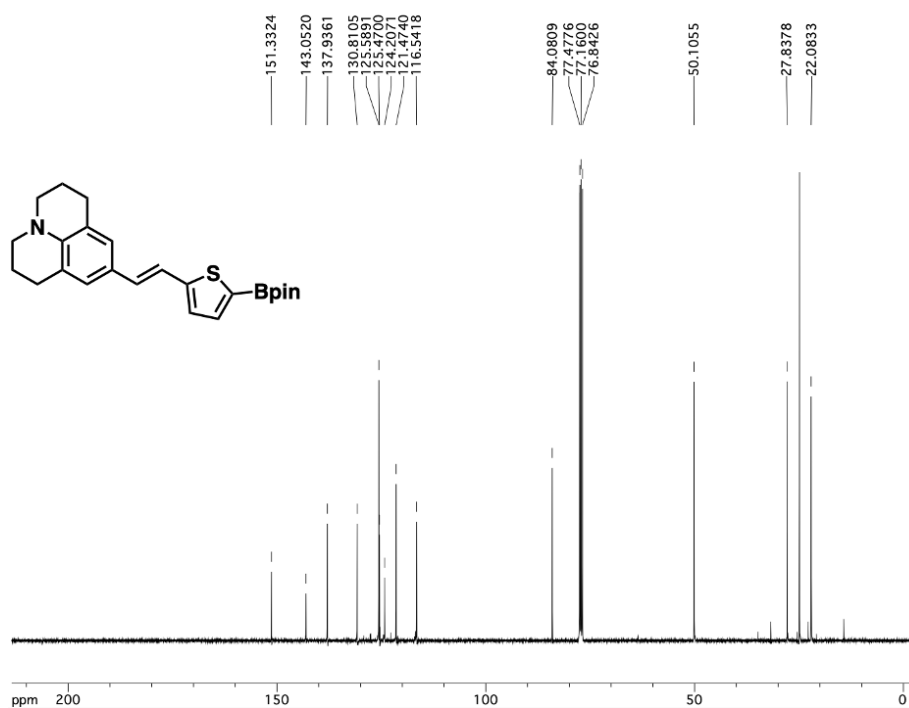

Figure S17:  $^1\text{H}$  NMR (400 MHz,  $\text{CDCl}_3$ ) of 7

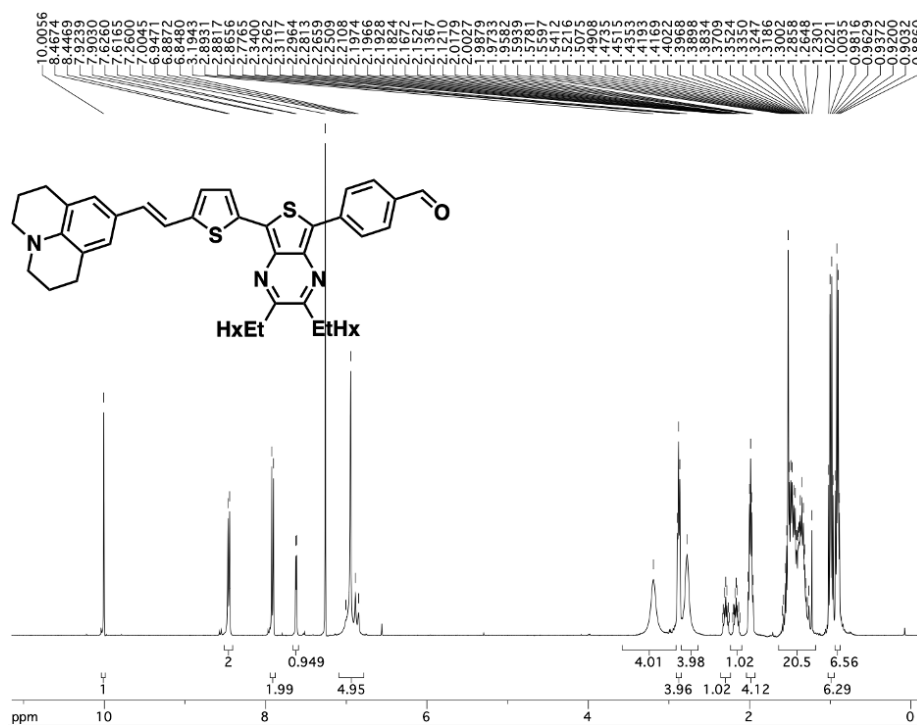

Figure S18:  $^{13}\text{C}$  NMR (100 MHz,  $\text{CDCl}_3$ ) of 7.

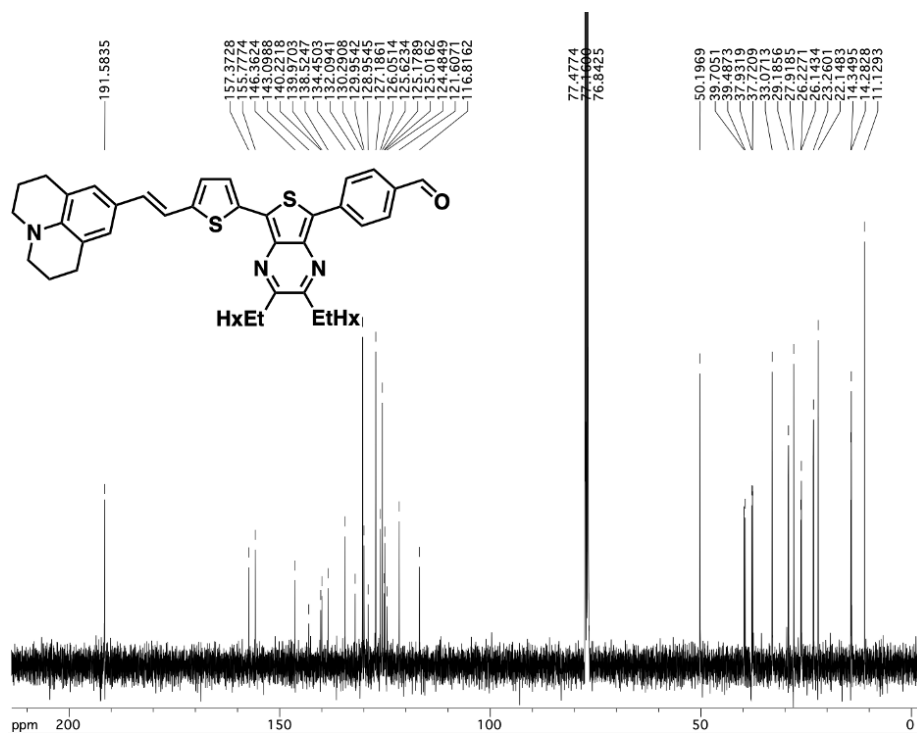



Figure S19:  $^1\text{H}$  NMR (400 MHz,  $\text{CDCl}_3$ ) of WM3

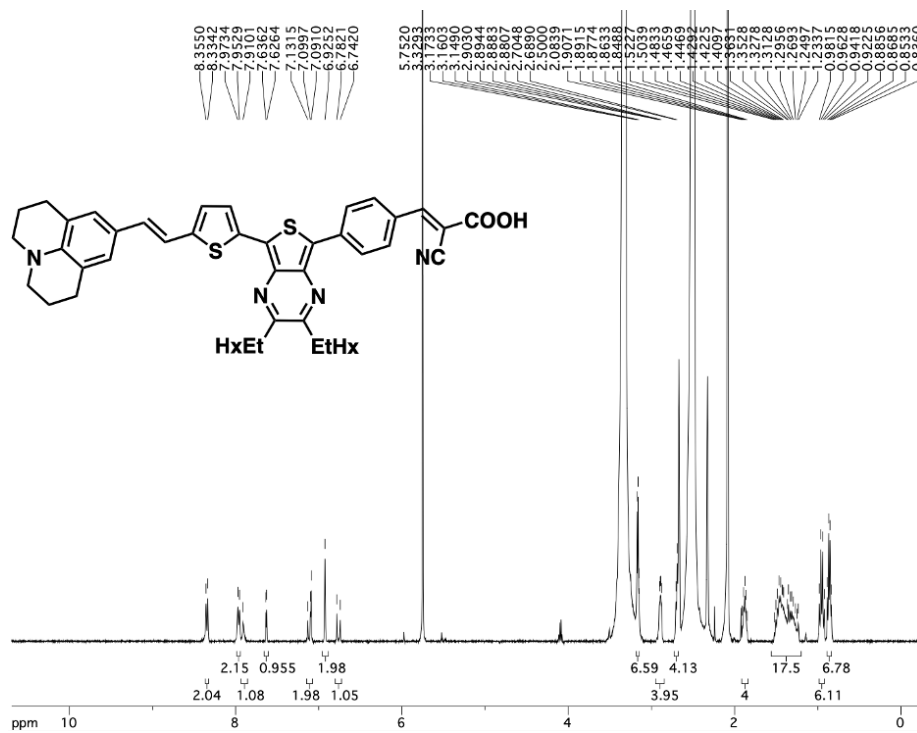

Figure S20: The theoretical dyes that are discussed for their HOMO/LUMO energy levels in the 800 to 1000 nm range from Figure S6A.

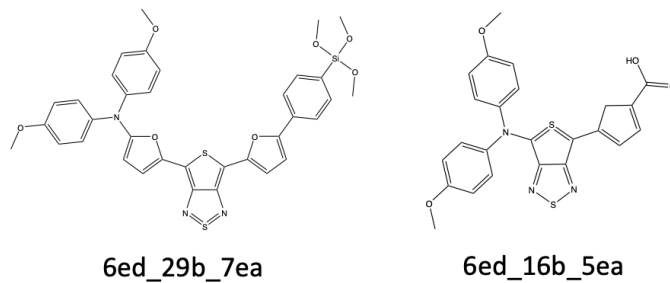

Figure S21: The theoretical dyes that are discussed for their HOMO/LUMO energy levels in the 600 to 800 nm range from Figure S6B.

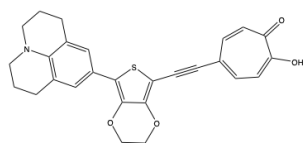

**22ed\_11b\_9ea**

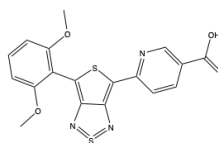

**21ed\_16b\_2ea**

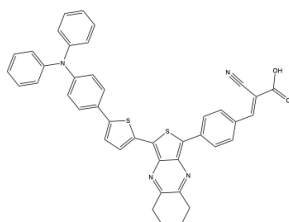

**13ed\_20b\_1ea**

Figure S22: The theoretical dyes that are discussed for their HOMO/LUMO energy levels in the 400 to 600 nm range from Figure S6C.

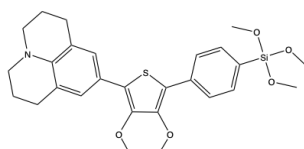

**22ed\_11b\_7ea**

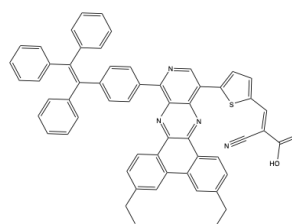

**17ed\_22b\_4ea**

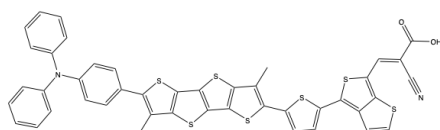

**1ed\_24b\_12ea**

Figure S23: The theoretical dyes that are discussed for their scoring properties.

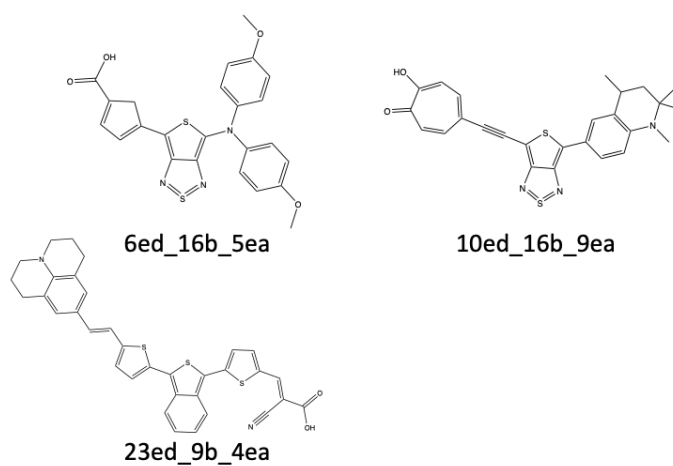

Figure S24: The geometry and selected orbitals for theoretical dye, 22ed\_16b\_5ea. A) HOMO and B) LUMO.

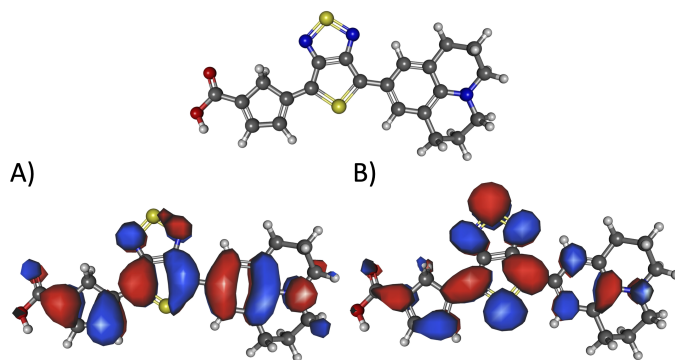

Figure S25: The geometry and selected orbitals for theoretical dye, 9ed\_20b\_1ea.  
A) HOMO and B) LUMO.

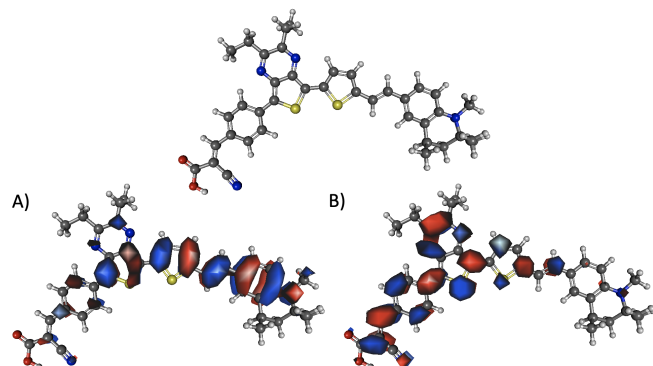

Supplement: d3dd00023k1.pdf [file d3dd00023k1.pdf]
